# Supplementary material for: Genome-scale flux balance analysis reveals redox trade-offs in the metabolism of the thermoacidophile Methylacidiphilum fumariolicum under auto-, hetero-and methanotrophic conditions
Source: Front Syst Biol. 2024 Jan 29;4:1291612. doi: 10.3389/fsysb.2024.1291612 (PMC12341988; doi:10.3389/fsysb.2024.1291612)
Supplement: Supplementary file 1 [file Table2.XLS]

## Sheet: Supp. Table S4
Sequence Identities for relevant proteins of C3 metabolism
Query				Hit
Locus Tag	Accession	gene	Description	Locus Tag	Accession	Identity	Coverage	E-value
IT6_09400	QSR88565.1	pmoA3	pmoA3	KZZ20_RS10330	WP_009059718.1	0.9799	1	2e-180
IT6_09955	QSR88666.1	pmoA2	pmoA2	KZZ20_RS10805	WP_009060827.1	0.9837	1	3e-180
IT6_09940	QSR88663.1	pmoA1	pmoA1	KZZ20_RS01935	MBW6414298.1	0.9429	1	1e-172
IT6_09380	QSR88561.1	gmcA	Gmc oxidoreductase A	KZZ20_RS10350	WP_009059725.1	0.91	0.97	0
IT6_09385	QSR88562.1	gmcB	Gmc oxidoreductase B	KZZ20_RS10345	WP_009059724.1	0.71	0.83	2e-101
IT6_00085	QSR88753.1		Methylglyoxal ABC Transporter	KZZ20_RS09420	WP_009058470.1	0.8	0.9	2e-138
IT6_09390	QSR88563.1		Lactoylglutathione lyase	KZZ20_RS10340	WP_009059722.1	0.83	0.92	2e-80
IT6_09210	QSR88531.1		Hydroxyacylglutathione hydrolase	KZZ20_RS03615	WP_009060705.1	0.82	0.91	2e-172

## Sheet: Supp. Table S5
gene	Description	Locus Tag
Alternative Complex III
actA	Cytochrome C	KZZ20_RS03945
actB	Iron cluster Protein	KZZ20_RS03940
actC	Polysulfide Reductase	KZZ20_RS03935
actD	DUF3341 domain-containing protein	KZZ20_RS03930
actE	Cytochrome C	KZZ20_RS03925
actF	Hypothetical Protein	KZZ20_RS03920
actG	Hypothetical Protein	KZZ20_RS03915
Methanol dehydrogenase and pyrroloquinoline biosynthetic cluster
xoxF	methanol/ethanol family PQQ-dependent dehydrogenase	KZZ20_RS02200
xoxJ	substrate-binding domain-containing protein	KZZ20_RS02195
xoxG	c-type cytochrome	KZZ20_RS02190
pqqC	pyrroloquinoline-quinone synthase PqqC	KZZ20_RS09695
pqqD	pyrroloquinoline quinone biosynthesis peptide chaperone PqqD	KZZ20_RS09700
pqqE	pyrroloquinoline quinone biosynthesis protein PqqE	KZZ20_RS09705
pqqA	pyrroloquinoline quinone precursor peptide PqqA	KZZ20_RS09685
Glutamate synthesis
gltB	Glutamate synthase	KZZ20_RS00150
glnA	type I glutamate--ammonia ligase	KZZ20_RS08255
	Glu/Leu/Phe/Val dehydrogenase	KZZ20_RS06210
L-arginine biosynthesis
carA	glutamine-hydrolyzing carbamoyl-phosphate synthase small subunit	KZZ20_RS07045
carB	arbamoyl-phosphate synthase large subunit	KZZ20_RS03805
argF	ornithine carbamoyltransferase	KZZ20_RS04965
argG	argininosuccinate synthase	KZZ20_RS07130
argH	argininosuccinate lyase	KZZ20_RS05540
argC	N-acetyl-gamma-glutamyl-phosphate reductase	KZZ20_RS04985
argJ	bifunctional glutamate N-acetyltransferase/amino-acid acetyltransferase	KZZ20_RS04980
argB	acetylglutamate kinase	KZZ20_RS04975
argD	acetylornithine transaminase	KZZ20_05055
argF	ornithine carbamoyltransferase	KZZ20_RS04965
argA	amino-acid N-acetyltransferase	KZZ20_RS01175
Periplasmic Methane Monooxygenase
pmoC3	methane monooxygenase subunit gamma	KZZ20_RS10335
pmoA3	methane monooxygenase subunit beta	KZZ20_RS10330
pmoB3	methane monooxygenase/ammonia monooxygenase subunit B	KZZ20_RS10325
pmoC2	methane monooxygenase/ammonia monooxygenase subunit C	KZZ20_RS10800
pmoA2	methane monooxygenase/ammonia monooxygenase subunit A	KZZ20_RS10805
pmoB2	methane monooxygenase/ammonia monooxygenase subunit B	KZZ20_RS10810
pmoC1	methane monooxygenase/ammonia monooxygenase subunit C	KZZ20_RS01930
pmoA1	methane monooxygenase/ammonia monooxygenase subunit A	KZZ20_RS01935
pmoB1	methane monooxygenase/ammonia monooxygenase subunit B	KZZ20_RS01940
CO2 fixation
	type I ribulose bisphosphate carboxylase large subunit	KZZ20_RS10475
	ribulose bisphosphate carboxylase small subunit	KZZ20_RS10470
	phosphoglycolate phosphatase	KZZ20_RS03590
glcF	glycolate oxidase subunit GlcF	KZZ20_RS02635
glcE	glycolate oxidase subunit GlcE	KZZ20_RS02640
	FAD-binding protein	KZZ20_RS02645

## Sheet: Supp. Table S6
List of gapfilled reactions necessary for biomass production
rxn_id	Name	Reaction	gene	Biomass precursor
CHRPL	Chorismate pyruvate lyase	chor_c --> 4hbz_c + pyr_c		ubiquinol
HXPDPS	Hexaprenyl diphosphate synthase ((2E,6E)-farnesyl-diphosphate specific)	frdp_c + 3.0 ipdp_c <=> hexdp_c + 3.0 ppi_c	KZZ20_RS02530 or KZZ20_RS07675	ubiquinol
DMATT	Dimethylallyltranstransferase	dmpp_c + ipdp_c <=> grdp_c + ppi_c	KZZ20_RS04480	ubiquinol
GRTT	Geranyltranstransferase	grdp_c + ipdp_c <=> frdp_c + ppi_c	KZZ20_RS02530 or KZZ20_RS07675	ubiquinol
OPHBDC	Octaprenyl-hydroxybenzoate decarboxylase	3ophb_c + h_c <=> 2oph_c + co2_c	KZZ20_RS05985	ubiquinol
OPHHXy	2-Octaprenylphenol hydroxylase (NADPH)	2oph_c + h_c + nadph_c + o2_c <=> 2ohph_c + h2o_c + nadp_c		ubiquinol
OHPHM	2-octaprenyl-6-hydroxyphenol methylase	2ohph_c + amet_c <=> 2omph_c + ahcys_c + h_c		ubiquinol
OMPHHXy	2-octaprenyl-6-methoxyphenol hydroxylase (NADPH)	2omph_c + h_c + nadph_c + o2_c <=> 2ombzl_c + h2o_c + nadp_c		ubiquinol
OMBZLM	2-Octaprenyl-6-methoxy-benzoquinol methylase	2ombzl_c + amet_c <=> 2ommbl_c + ahcys_c + h_c	KZZ20_RS09855	ubiquinol
OMMBLHXy	2-Octaprenyl-3-methyl-6-methoxy-1,4-benzoquinol hydroxylase (NADPHl)	2ommbl_c + h_c + nadph_c + o2_c <=> 2omhmbl_c + h2o_c + nadp_c		ubiquinol
DMQMT	3-Dimethylubiquinonol 3-methyltransferase	2omhmbl_c + amet_c <=> ahcys_c + h_c + q8h2_im		ubiquinol
MEOHDHipp	Lantanide dependent methanol dehydrogenase	2.0 ficytC_p + meoh_p --> fald_p + 2.0 focytC_p + 2.0 h_p	KZZ20_RS02200 and KZZ20_RS02195 and KZZ20_RS02190	formaldehyde
GLUR	Glutamate racemase	glu__L_c <=> glu__D_c		peptidoglycan
MALCOAM	Malonyl-coa methylation	amet_c + malACP_c --> ahcys_c + malmeACP_c		biotin
MALACPD	Malonyl-ACP methyl ester C-acyltransferase decarboxylating	h_c + malACP_c + malmeACP_c --> ACP_c + co2_c + skgmeACP_c	KZZ20_RS06360	biotin
KGLACPR	3-Ketoglutaryl-ACP methyl ester reduction	h_c + nadph_c + skgmeACP_c --> hgmeACP_c + nadp_c	KZZ20_RS06370	biotin
OGMEACPD	3-Oxo-glutaryl-[ACP] methyl ester dehydratase	hgmeACP_c --> egmeACP_c + h2o_c		biotin
EGMEACPR	Enoylglutaryl-[ACP] methyl ester reductase	egmeACP_c + h_c + nadh_c --> gmeACP_c + nad_c	KZZ20_RS07920	biotin
OPMEACPS	3-Oxo-pimeloyl-[ACP] methyl ester synthase	gmeACP_c + h_c + malACP_c --> ACP_c + co2_c + skpmeACP_c	KZZ20_RS06360	biotin
KPIMR	3-Ketopimeloyl-ACP methyl ester reductase	h_c + nadph_c + skpmeACP_c --> hpmeACP_c + nadp_c	KZZ20_RS06370	biotin
OPMEACPD	3-Oxo-pimeloyl-[ACP] methyl ester dehydratase	hpmeACP_c --> epmeACP_c + h2o_c		biotin
EPMEACPR	Enoylpimeloyl-[ACP] methyl ester reductase	epmeACP_c + h_c + nadh_c --> nad_c + pmeACP_c	KZZ20_RS07920	biotin
PMEACPE	Pimeloyl-[ACP] methyl ester esterase	h2o_c + pmeACP_c --> h_c + meoh_c + pimACP_c		biotin
AOXSr2	8-amino-7-oxononanoate synthase	ala__L_c + h_c + pimACP_c --> 8aonn_c + ACP_c + co2_c	KZZ20_RS08340	biotin
MOAT	3-deoxy-D-manno-octulosonic acid transferase	ckdo_c + lipidA_c <=> cmp_c + h_c + kdolipid4_c	KZZ20_RS07580	kdo-lipid
MOAT2	3-deoxy-D-manno-octulosonic acid transferase	ckdo_c + kdolipid4_c <=> cmp_c + h_c + kdo2lipid4_c	KZZ20_RS07580	kdo-lipid
3OAS180	3-oxoacyl-[acyl-carrier-protein] synthase (n-C18:0)	h_c + malACP_c + palmACP_c <=> 3ooctdACP_c + ACP_c + co2_c	KZZ20_RS06360	stearate
3OAR180	3-oxoacyl-[acyl-carrier-protein] reductase (n-C18:0)	3ooctdACP_c + h_c + nadph_c <=> 3hoctaACP_c + nadp_c	KZZ20_RS06370	stearate
3HAD180	3-hydroxyacyl-[acyl-carrier-protein] dehydratase (n-C18:0)	3hoctaACP_c <=> h2o_c + toctd2eACP_c	KZZ20_RS04555	stearate
EAR180x	Enoyl-[acyl-carrier-protein] reductase (NADH) (n-C18:0)	h_c + nadh_c + toctd2eACP_c --> nad_c + ocdcaACP_c	KZZ20_RS07920	stearate
FA180ACPH	Fatty acyl ACP hydrolase	h2o_c + ocdcaACP_c <=> ACP_c + h_c + ocdca_c		stearate
FA140ACPHi	Fatty-acyl-ACP hydrolase	h2o_c + myrstacp_c <=> ACP_c + h_c + ttdca_c		tetradecanoate
CHORD	Chorismate dehydratase	chor_c <=> 3cv1obz_c + h2o_c	KZZ20_RS03815	menaquinol
AFUTD	Aminodeoxyfutalosine deaminase	6a6dofut_c + h2o_c + h_c --> fut_c + nh4_c	KZZ20_RS08345	menaquinol
FUTH	Futalosine hydrolase	fut_c + h2o_c <=> dhxfut_c + hxan_c		menaquinol
DHNAS1	1,4-dihydroxy-6-naphthoate synthase	cdhxfut_c --> dha_c + dhna_c	KZZ20_RS10575	menaquinol
TDP	Thiamin pyrophosphatase	frdp_c + 5.0 ipdp_c <=> octdp_c + 5.0 ppi_c		menaquinol
HSST	Homoserine O-succinyltransferase	hom__L_c + succoa_c <=> coa_c + suchms_c		methionine
SHSL1	O-succinylhomoserine lyase (L-cysteine)	cys__L_c + suchms_c <=> cyst__L_c + h_c + succ_c		methionine
CYSTL	Cystathionine b-lyase	cyst__L_c + h2o_c <=> hcys__L_c + nh4_c + pyr_c		methionine
METS	Methionine synthase	5mthf_c + hcys__L_c <=> h_c + met__L_c + thf_c	KZZ20_RS03580	methionine
GCALDD	Glycolaldehyde dehydrogenase	gcald_c + h2o_c + nad_c <=> glyclt_c + 2.0 h_c + nadh_c	KZZ20_RS10905 or KZZ20_RS10905 or KZZ20_RS07550	formyl-thf-glu
OOR3r	2-oxoglutarate synthase (rev)	akg_c + coa_c + 2.0 fdxo_2_2_c --> co2_c + 2.0 fdxrd_c + h_c + succoa_c	KZZ20_RS09715	ferredoxin
POR_syn	Pyruvate-ferredoxin oxidoreductase	coa_c + 2.0 fdxo_2_2_c + pyr_c --> accoa_c + co2_c + 2.0 fdxrd_c + h_c	KZZ20_RS09715	ferredoxin
NTD3pp	5'-nucleotidase (dCMP)	dcmp_c + h2o_c <=> dcyt_c + pi_c		beta-alanine
ASP1DC	Aspartate 1-decarboxylase	asp__L_c + h_c <=> ala_B_c + co2_c		beta-alanine
NTD2	5'-nucleotidase (UMP)	h2o_c + ump_c <=> pi_c + uri_c		beta-alanine
OIVD2	2-oxoisovalerate dehydrogenase (acylating; 3-methyl-2-oxobutanoate)	3mob_c + coa_c + nad_c <=> co2_c + ibcoa_c + nadh_c	( KZZ20_RS08245 or KZZ20_RS07910 ) and KZZ20_RS02165 and KZZ20_RS02155	iso-branched fatty acids
PSD180	Phosphatidylserine decarboxylase (n-C18:0)	h_c + ps180_c <=> co2_c + pe180_c	KZZ20_RS05270	phosphatidylserine
PSD160	Phosphatidylserine decarboxylase (n-C16:0)	h_c + ps160_c <=> co2_c + pe160_c	KZZ20_RS05270	phosphatidylserine
PSD140	Phosphatidylserine decarboxylase (n-C14:0)	h_c + ps140_c <=> co2_c + pe140_c	KZZ20_RS05270	phosphatidylserine
PSSA180	Phosphatidylserine syntase (n-C18:0)	cdpdodecg_c + ser__L_c <=> cmp_c + h_c + ps180_c	KZZ20_RS05265	phosphatidylserine
PSSA160	Phosphatidylserine syntase (n-C16:0)	cdpdhdecg_c + ser__L_c <=> cmp_c + h_c + ps160_c	KZZ20_RS05265	phosphatidylserine
PSSA140	Phosphatidylserine syntase (n-C14:0)	cdpdtdecg_c + ser__L_c <=> cmp_c + h_c + ps140_c	KZZ20_RS05265	phosphatidylserine
DASYN180	CDP-diacylglycerol synthetase (n-C18:0)	ctp_c + h_c + pa180_c <=> cdpdodecg_c + ppi_c	KZZ20_RS05275	CDP-diacylglycerol
DASYN160	CDP-diacylglycerol synthetase (n-C16:0)	ctp_c + h_c + pa160_c <=> cdpdhdecg_c + ppi_c	KZZ20_RS05275	CDP-diacylglycerol
DASYN140	CDP-diacylglycerol synthetase (n-C14:0)	ctp_c + h_c + pa140_c <=> cdpdtdecg_c + ppi_c	KZZ20_RS05275	CDP-diacylglycerol
AGPAT180	1-octadecanoyl-sn-glycerol 3-phosphate O-acyltransferase (n-C18:0)	1odecg3p_c + ocdcaACP_c <=> ACP_c + pa180_c	KZZ20_RS07075 or KZZ20_RS07325	phosphatidylethanolamine
AGPAT160	1-hexadecanoyl-sn-glycerol 3-phosphate O-acyltransferase (n-C16:0)	1hdecg3p_c + palmACP_c <=> ACP_c + pa160_c	KZZ20_RS07075 or KZZ20_RS07325	phosphatidylethanolamine
AGPAT140	1-tetradecanoyl-sn-glycerol 3-phosphate O-acyltransferase (n-C14:0)	1tdecg3p_c + myrstacp_c <=> ACP_c + pa140_c	KZZ20_RS07075 or KZZ20_RS07325	phosphatidylethanolamine
G3PAT160	Glycerol-3-phosphate acyltransferase (C16:0)	glyc3p_c + ocdcaACP_c <=> 1odecg3p_c + ACP_c	KZZ20_RS00690	phosphatidylethanolamine
G3PAT180	Glycerol-3-phosphate acyltransferase (C18:0)	glyc3p_c + palmACP_c <=> 1hdecg3p_c + ACP_c	KZZ20_RS00690	phosphatidylethanolamine
G3PAT140	Glycerol-3-phosphate acyltransferase (C14:0)	glyc3p_c + myrstacp_c <=> 1tdecg3p_c + ACP_c	KZZ20_RS00690	phosphatidylethanolamine
PGPP180	Phosphatidylglycerol phosphate phosphatase (n-C18:0)	h2o_c + pgp180_c <=> pg180_c + pi_c	KZZ20_RS08350 or KZZ20_RS08265	phosphatidylglycerol
PGPP160	Phosphatidylglycerol phosphate phosphatase (n-C16:0)	h2o_c + pgp160_c <=> pg160_c + pi_c	KZZ20_RS08350 or KZZ20_RS08265	phosphatidylglycerol
PGSA180	Phosphatidylglycerol synthase (n-C18:0)	cdpdodecg_c + glyc3p_c <=> cmp_c + h_c + pgp180_c	KZZ20_RS00360	phosphatidylglycerol
PGSA160	Phosphatidylglycerol synthase (n-C16:0)	cdpdhdecg_c + glyc3p_c <=> cmp_c + h_c + pgp160_c	KZZ20_RS00360	phosphatidylglycerol
CDLPNS140cmp	Cardiolipin synthase 14:0 (CMP-forming)	cdpdtdecg_c + pg140_c <=> clpn140_c + cmp_c + h_c	KZZ20_RS00660	cardiolipin
UPPDC1	Uroporphyrinogen decarboxylase (uroporphyrinogen III)	4.0 h_c + uppg3_c --> 4.0 co2_c + cpppg3_c		protoheme
CPPPGO2	Oxygen Independent coproporphyrinogen-III oxidase	2.0 amet_c + cpppg3_c --> 2.0 co2_c + 2.0 dad_5_c + 2.0 met__L_c + pppg9_c	KZZ20_RS01255	protoheme
PPPGO2	Protoporphyrinogen oxidase (anaerobic, menaquinone)	3.0 mqn8_p + pppg9_c --> 3.0 mql8_p + ppp9_c		protoheme
FCLT	Ferrochelatase	fe2_c + ppp9_c --> 2.0 h_c + pheme_c		protoheme
HEMEAS_2	Heme A synthase (menaquinone)	h2o_c + hemeO_c + 2.0 mqn8_p --> hemeA_c + 2.0 mql8_p	KZZ20_RS08870	protoheme
GLGC	Glucose-1-phosphate adenylyltransferase	atp_c + g1p_c + h_c <=> adpglc_c + ppi_c	KZZ20_RS00675	glycogen
GLCS1	Glycogen synthase (ADPGlc)	adpglc_c <=> adp_c + glycogen_c + h_c	KZZ20_RS04945	glycogen
FRD	FRD	fad_c + succ_c <=> fadh2_c + fum_c		2fe2s
SCYSDS	SUF Cysteine desulfuration	cys__L_c + sufse_c <=> ala__L_c + sufsesh_c		2fe2s
S2FE2SS	SUF [2Fe-2S] Synthesis	atp_c + fadh2_c + 2.0 fe2_c + h2o_c + sufbcd_c + 2.0 sufsesh_c <=> adp_c + fad_c + 7.0 h_c + pi_c + sufbcd_2fe2s_c + 2.0 sufse_c		2fe2s
S2FE2ST	SUF [2Fe-2S] Transfer	4.0 h_c + sufbcd_2fe2s_c <=> 2fe2s_c + sufbcd_c		2fe2s
S2FE2SR	SUF [2Fe-2S] regeneration	2fe1s_c + atp_c + h2o_c + sufbcd_c + sufsesh_c <=> adp_c + 5.0 h_c + pi_c + sufbcd_2fe2s_c + sufse_c		2fe2s
CU2t5pp	Copper transport in via proton symport (periplasm)	h_p + cu2_p <=> h_c + cu2_c	KZZ20_RS00745
CU2tex	Copper (Cu+2) transport via diffusion (extracellular to periplasm)	cu2_e <=> cu2_p
CA2tex	Calcium (Ca+2) transport via diffusion (extracellular to periplasm)	ca2_e <=> ca2_p
COBALT2tex	Cobalt (Co+2) transport via diffusion (extracellular to periplasm)	cobalt2_e <=> cobalt2_p
MNtex	Manganese (Mn+2) transport via diffusion (extracellular to periplasm)	mn2_e <=> mn2_p
CLtex	Chloride (Cl-1) transport via diffusion (extracellular to periplasm)	cl_e <=> cl_p
COtex	Carbon monoxide transport via diffusion (extracellular to periplasm)	co_e <=> co_p
COtpp	Carbon monoxide transport via diffusion (periplasm)	co_p <=> co_c
CBL1abcpp	Cob(1)alamin transport via ABC system (periplasmic)	atp_c + h2o_c + cbl1_p <=> adp_c + cbl1_c + h_c + pi_c	KZZ20_RS04870
CBL1MT	Cob(1)alamin methyltransferase	amet_c + cbl1_c <=> mcbl3_c + ahcys_c
CBL1tex	Diffusion to periplasm	cbl1_e <=> cbl1_p
FALDtpp	Formaldehyde transport via diffusion (periplasm)	fald_p <=> fald_c
CU2t3pp	Copper transport out via proton antiport (periplasm)	cu2_c + h_p <=> h_c + cu2_p
CA2abcpp	Calcium transport via ABC system	atp_c + h2o_c + ca2_p <=> adp_c + ca2_c + h_c + pi_c
Cobalt2abcppI	Cobalt II transport via ABC system periplasm I	atp_c + h2o_c + cobalt2_p <=> adp_c + cobalt2_c + h_c + pi_c
MN2tpp	Manganese transport in via permease (no H+)	mn2_p <=> mn2_c
CLtipp	Chloride ion transport in via diffusion (periplasm)	cl_p <=> cl_c
PGLYCP	Phosphoglycolate phosphatase	2pglyc_c + h2o_c <=> glyclt_c + pi_c	KZZ20_RS03590	Deadend Metabolite
DHAK	Dihydroxyacetone kinase	atp_c + dha_c <=> adp_c + dhap_c + h_c		Deadend Metabolite
DHAPT	Dihydroxyacetone phosphotransferase	dha_c + pep_c <=> dhap_c + pyr_c		Deadend Metabolite
PPM2	Phosphopentomutase 2 (deoxyribose)	2dr1p_c <=> 2dr5p_c		Deadend Metabolite

## Sheet: Supp. Table S7
List of gapfilled reactions based on genetic or phenotypic evidence
rxn_id	Name	Reaction	gene	System
AGDI_1	Agmatine deiminase	agm_c + h2o_c <=> nh4_c + Ncbmpts_c	KZZ20_RS02310	acid resistance
CMPA_1	N-carbamoylputrescine amidase	2.0 h_c + h2o_c + Ncbmpts_c <=> co2_c + nh4_c + ptrc_c	KZZ20_RS02315	acid resistance
ABTA	4-aminobutyrate transaminase	4abut_c + akg_c <=> glu__L_c + sucsal_c	KZZ20_RS02145	acid resistance
GGPTRCS	Gamma glutamyl putrescine synthase	atp_c + glu__L_c + ptrc_c <=> adp_c + ggptrc_c + h_c + pi_c		acid resistance
GGPTRCO	Gamma glutamyl putrescine oxidase	ggptrc_c + h2o_c + o2_c <=> ggbutal_c + h2o2_c + nh4_c		acid resistance
GGGABADr	Gamma-glutamyl-gamma aminobutyric acid dehydrogenase	ggbutal_c + h2o_c + nadp_c <=> gg4abut_c + 2.0 h_c + nadph_c		acid resistance
GGGABAH	Gamma-glutamyl-gamma-aminobutyric acid hydrolase	gg4abut_c + h2o_c <=> 4abut_c + glu__L_c	KZZ20_RS09600	acid resistance
ATPS2	H+-exporting ATPase	atp_c + h2o_c + 3.0 h_c <=> adp_c + 4.0 h_e + pi_c		acid resistance
HYD4pp	Hydrogenase (menaquinole, no proton translocation) (periplasm)	mql8_c <=> mqn8_c + h2_p	(KZZ20_RS06650 and KZZ20_RS06655 and KZZ20_RS06660 and KZZ20_RS06665) or (KZZ20_RS03120 and KZZ20_RS03125)	Hydrogen oxidation
MCPST	3-mercaptopyruvate sulfurtransferase	cyan_c + mercppyr_c <=> h_c + pyr_c + tcynt_c	KZZ20_RS05915 or KZZ20_RS09840	Thiosulfate oxidation
CYANST	Cyanide sulfurtransferase	cyan_c + tsul_c <=> h_c + so3_c + tcynt_c	KZZ20_RS05915 or KZZ20_RS09840	Thiosulfate oxidation
CYNTt2pp	Cyanate transport via proton symport (periplasm)	cynt_p + h_p <=> cynt_c + h_c		Cyanate
PPANAp	Sodium-translocating pyrophosphatase	h2o_c + na1_c + ppi_c <=> h_c + 2.0 pi_c + na1_p	KZZ20_RS00430	Heavy metal resistance
NAt3_2pp	Sodium proton antiporter (H:NA is 2) (periplasm)	na1_c + 2.0 h_p <=> 2.0 h_c + na1_p		Heavy metal resistance
HG2tppi	Mercury Hg2 transport via diffusion periplasm to cytoplasm	hg2_p <=> hg2_c		Heavy metal resistance
MNabc_1	Manganese Mn2 transport via ABC system periplasm	atp_c + h2o_c + mn2_p <=> adp_c + h_c + mn2_c + pi_c		Heavy metal resistance
IPPOHDHpp	Isopropanol dehydrogenase (periplasm)	2.0 ficytC_p + 2ppoh_p <=> acetone_p + 2.0 focytC_p + 2.0 h_p	(KZZ20_RS10350 and KZZ20_RS10345) or (KZZ20_RS02200 and KZZ20_RS02195 and KZZ20_RS02190 )	C3 metabolism
ACOHDHpp	Acetol dehydrogenase (periplasm)	2.0 ficytC_p + acetol_p <=> mthgxl_p + 2.0 focytC_p + 2.0 h_p	KZZ20_RS10350 and KZZ20_RS10345	C3 metabolism
MTHGXLtabcpp	Methylglyoxal ABC transport (periplasm)	atp_c + h2o_c + mthgxl_p <=> adp_c + mthgxl_c + h_c + pi_c	KZZ20_RS09420 and KZZ20_RS09425	C3 metabolism
C3H8OXq8	Propane monooxygenase (ubiquinone)	c3h8_p + o2_p + q8h2_p --> 2ppoh_p + h2o_p + q8_p	KZZ20_RS10810 and KZZ20_RS10800 and KZZ20_RS10805	C3 metabolism
ACTNMOq8	Acetone monooxygenase (ubiquinone)	acetone_p + o2_p + q8h2_p --> acetol_p + h2o_p + q8_p	KZZ20_RS10325 and KZZ20_RS10330 and KZZ20_RS10335	C3 metabolism
LGTHL	Lactoylglutathione lyase	lgt__S_c <=> gthrd_c + mthgxl_c	KZZ20_RS10340	C3 metabolism
GLYOX	Hydroxyacylglutathione hydrolase	h2o_c + lgt__S_c <=> gthrd_c + h_c + lac__D_c	KZZ20_RS03615	C3 metabolism
LDH_D	D-lactate dehydrogenase	lac__D_c + nad_c <=> h_c + nadh_c + pyr_c		C3 metabolism
NO3t7p	Nitrate transport in via nitrite antiport	no2_c + no3_p <=> no3_c + no2_p	KZZ20_RS08615	Hydroxylamine oxidation
NITR	Nitrate reductase (NADH)	h_c + nadh_c + no3_c <=> h2o_c + nad_c + no2_c	KZZ20_RS08600	Hydroxylamine oxidation
CBMD	Carbamate deaminase (spontaneuos)	cbm_c + 2.0 h_c <=> co2_c + nh4_c		Hydroxylamine oxidation
CBPD	Carbamoyl phosphate degradation (spontaneous)	cbp_c <=> cynt_c + h_c + pi_c		Hydroxylamine oxidation
AMOq8	Ammonia monoxygenase (ubiquinol)	q8h2_im + nh4_c + o2_p --> h2o_p + ham_p + q8_im		Hydroxylamine oxidation
HAO1pp	Hydroxylamine oxidoreductase	ham_p + h2o_p + 4 ficytC_p <=> no2_p + 4 focytC_p + 5 h_p	KZZ20_RS05510 and KZZ20_RS05515	Hydroxylamine oxidation
HAO2pp	Hydroxylamine oxidoreductase	ham_p + 3 ficytC_p <=> no_p + 3 focytC_p + 3 h_p	KZZ20_RS05510 and KZZ20_RS05515	Hydroxylamine oxidation
NITR_NOpp	Nitrite reductase (NO-forming)	focytC_p + 2.0 h_p + no2_p <=> ficytC_p + h2o_p + no_p	KZZ20_RS02495	Hydroxylamine oxidation
NORpp	Nitric oxide reductase	2.0 h_p + 2.0 no_p + 2.0 focytC_p <=> h2o_p + n2o_p + 2.0 ficytC_p	KZZ20_RS05150 and KZZ20_RS05145	Hydroxylamine oxidation
N2ORp	Nitrous oxide reductase (cytochrome)	2 h_p + n2o_p + 2 focytC_p <=> h2o_p + 2.0 ficytC_p + n2_p		Hydroxylamine oxidation
HAM1tpp	Hydroxylamine (H4NO to H3NO) transport via diffusion (periplasm)	ham_p <=> ham_c + h_c		Hydroxylamine oxidation
CYNTtex	Cyanate transport via diffusion (extracellular to periplasm)	cynt_e <=> cynt_p		Hydroxylamine oxidation
CYNTt2pp	Cyanate transport via proton symport (periplasm)	cynt_p + h_p --> cynt_c + h_c		Hydroxylamine oxidation
NO2tpp	NO2 transport (diffusion)	no2_p <=> no2_c		Hydroxylamine oxidation
NO2tex	Nitrite transport via diffusion (extracellular to periplasm)	no2_e <=> no2_p		Hydroxylamine oxidation
NO3tex	Nitrate transport via diffusion (extracellular to periplasm)	no3_e <=> no3_p		Hydroxylamine oxidation
N2Otex	Nitrious oxide transport via diffusion (extracellular to periplasm)	n2o_e <=> n2o_p		Hydroxylamine oxidation
NOtex	Nitric oxide transport via diffusion (extracellular to periplasm)	no_e <=> no_p		Hydroxylamine oxidation

## Sheet: Supp. Table S8
List of new BiGG identifiers
New BiGG id	Description	Reaction	gpr	biocyc	ec-code	metanetx.reaction	Added based on
C3H8tex	Propane transport via diffusion (extracelular to periplash)	c3h8_e <=> c3h8_p					Gapfilling/Literature information
NITR_NOpp	Nitrite reductase (NO-forming)	focytC_p + 2.0 h_p + no2_p --> ficytC_p + h2o_p + no_p	KZZ20_RS02495	metacyc.reaction:NITRITE-REDUCTASE-CYTOCHROME-RXN	1.7.2.1	MNXR140126	Homology
DMPPS1	1-hydroxy-2-methyl-2-(E)-butenyl 4-diphosphate reductase (dmpp)	2.0 fdxrd_c + h2mb4p_c + 2.0 h_c --> dmpp_c + 2.0 fdxo_2_2_c + h2o_c	KZZ20_RS04480	metacyc.reaction:RXN0-884	1.17.7.4	MNXR111778	Homology
NADHK	NADH kinase	atp_c + nadh_c --> adp_c + h_c + nadph_c	KZZ20_RS04285	metacyc.reaction:NADH-KINASE-RXN	2.7.1.86	MNXR106390	Homology
ACTNMOq8	Acetone monooxygenase (ubiquinone)	acetone_p + o2_p + q8h2_p --> acetol_p + h2o_p + q8_p	KZZ20_RS10325 and KZZ20_RS10330 and KZZ20_RS10335	metacyc.reaction:RXN-8630	1.14.14.1	MNXR122406	Homology
AFUTD	Aminodeoxyfutalosine deaminase	6a6dofut_c + h2o_c + h_c --> fut_c + nh4_c	KZZ20_RS08345	metacyc.reaction:RXN-14910	3.5.4.40	MNXR114015	Homology
HAO2pp	Hydroxylamine oxidoreductase	3.0 ficytC_p + ham_p --> 3.0 focytC_p + 4.0 h_p + no_p	KZZ20_RS05510 and KZZ20_RS05515	metacyc.reaction:RXN-13570	1.7.2.9	MNXR140335	Homology
SAMU3_1	uroporphyrinogen-III C-methyltransferase	amet_c + uppg3_c --> ahcys_c + h_c + pc1_c	KZZ20_RS00510	metacyc.reaction:UROPORIIIMETHYLTRANSA-RXN		MNXR110922	Homology
PHEH	Phenylalanine hydroxylase (THF)	10fthf_c + o2_c + phe__L_c --> 4h10fthf_c + tyr__L_c		metacyc.reaction:RXN-13907	1.14.16.1	MNXR118397	Gapfilling/Literature information
NO3t7p	Nitrate transport in via nitrite antiport	no2_c + no3_p --> no2_p + no3_c	KZZ20_RS08615	metacyc.reaction:TRANS-RXN0-239		MNXR101995	Homology
RNTR5	Ribonucleoside triphosphate reductase ITP	itp_c + trdrd_c --> ditp_c + h2o_c + trdox_c	KZZ20_RS03465	metacyc.reaction:1.17.4.2-RXN	1.17.4.2	MNXR108805	Homology
AHTS	Aminobacteriohopanetriol synthase	fhp_c + glu__L_c <=> abhptriol_c + akg_c		metacyc.reaction:RXN-13533		MNXR118154	Gapfilling/Literature information
RNTRA5	Ribonucleoside triphosphate reductase ITP	for_c + h_c + itp_c --> co2_c + ditp_c + h2o_c	KZZ20_RS03465	metacyc.reaction:RIBONUCLEOSIDE-TRIP-REDUCT-RXN	1.1.98.6	MNXR116254	Homology
NORpp	Nitric oxide reductase	2.0 focytC_p + 2.0 h_p + 2.0 no_p --> 2.0 ficytC_p + h2o_p + n2o_p	KZZ20_RS05150 and KZZ20_RS05145	metacyc.reaction:NITRIC-OXIDE-REDUCTASE-RXN	1.7.2.5	MNXR140125	Homology
MEOHtpp	Methanol transport via diffusion (periplasm to cytosol)	meoh_p <=> meoh_c					Gapfilling/Literature information
HBZHPT	Hydroxybenzoate hexaprenyltransferase	4hbz_c + hexdp_c <=> 3ophb_5_c + ppi_c	KZZ20_RS10775	metacyc.reaction:RXN-9003	2.5.1.39	MNXR145176	Homology
D5OAP	5-deoxyadenosine phosphorylase	dad_5_c + pi_c --> ade_c + d5rib1p_c	KZZ20_RS06225	metacyc.reaction:RXN-14304	2.4.2.28	MNXR118608	Homology
ACOHDHpp	Acetol dehydrogenase (periplasm)	acetol_p + 2.0 ficytC_p --> 2.0 focytC_p + 2.0 h_p + mthgxl_p	KZZ20_RS10350 and KZZ20_RS10345				Homology
PC1MT	Pecorrin-1 methyltransferase	amet_c + pc1_c --> ahcys_c + dscl_c	KZZ20_RS00510	metacyc.reaction:RXN-8675		MNXR149828	Homology
AFTS	Aminodeoxyfutalosine synthase	3cv1obz_c + amet_c + h2o_c --> 6a6dofut_c + h_c + hco3_c + met__L_c	KZZ20_RS10780	metacyc.reaction:RXN-15264	2.5.1.120	MNXR113988	Homology
UAAGMDAt2	PBP substrate translocator	h_p + uaagmda_c <=> h_c + uaagmda_p		metacyc.reaction:TRANS-RXN0-286		MNXR152149	Gapfilling/Literature information
CDLPNS180cmp	Cardiolipin synthase 18:0 (CMP-forming)	cdpdodecg_c + pg180_c --> clpn180_c + cmp_c + h_c	KZZ20_RS00660	metacyc.reaction:RXN-8141	2.7.8.41		Homology
FALTHFL	Formaldehyde tetrahydrofolate ligase (spontaneous)	fald_c + thf_c --> h2o_c + mlthf_c		metacyc.reaction:RXN-2881		MNXR121639	Gapfilling/Literature information
NIT1c	Nitrogenase	16.0 atp_c + 8.0 fdxrd_c + 16.0 h2o_c + n2_c --> 16.0 adp_c + 8.0 fdxo_2_2_c + h2_c + 6.0 h_c + 2.0 nh4_c + 16.0 pi_c	KZZ20_RS05825 or KZZ20_RS05830 or KZZ20_RS05835	metacyc.reaction:NITROGENASE-RXN	1.18.6.1	MNXR109381	Homology
SK_cbl3_c	cob(III)alamin sink	cbl3_c <=>					Gapfilling/Literature information
SUCDHq8	Succinate dehydrogenase (ubiquinone)	q8_p + succ_c --> fum_c + q8h2_p	KZZ20_RS01605 and KZZ20_RS01610 and KZZ20_RS01615	metacyc.reaction:SUCCINATE-DEHYDROGENASE-UBIQUINONE-RXN	1.3.5.1	MNXR123892	Homology
D5OR1PI	5-deoxyribose 1-phosphate isomerase	d5rib1p_c --> d5rbp_c		metacyc.reaction:RXN-21315	5.3.1.23	MNXR171635	Gapfilling/Literature information
CU2t5pp	Copper transport in via proton symport (periplasm)	cu2_p + h_p --> cu2_c + h_c	KZZ20_RS00745				Gapfilling/Literature information
HMBDPO	RXN0-882	2mecdp_c + 2.0 fdxrd_c + h_c --> 2.0 fdxo_2_2_c + h2mb4p_c + h2o_c	KZZ20_RS03990	metacyc.reaction:RXN0-882	1.17.7.1	MNXR112205	Homology
HAO1pp	Hydroxylamine oxidoreductase	4.0 ficytC_p + h2o_p + ham_p --> 4.0 focytC_p + 6.0 h_p + no2_p	KZZ20_RS05510 and KZZ20_RS05515	metacyc.reaction:HAONITRO-RXN	1.7.2.6	MNXR140086	Homology
L3EHAAL	L-erythro-3-hydroxyaspartate ammonia-lyase	3hasp__L_c --> nh4_c + oaa_c		metacyc.reaction:4.3.1.20-RXN	4.3.1.20	MNXR106484	Gapfilling/Literature information
ACETONEtex	Acetone transport via diffusion (extracellurar to periplasm)	acetone_e <=> acetone_p					Gapfilling/Literature information
D5OR1PA	5-deoxy-D-ribulose 1-phosphate aldolase	d5rbp_c <=> acald_c + dhap_c	KZZ20_RS06095	metacyc.reaction:RXN-21316	4.1.2.62	MNXR171636	Homology
CBL1tex	Diffusion to periplasm	cbl1_e <=> cbl1_p					Gapfilling/Literature information
PT4ACAMDASE	Pterin-4alpha-carbinolamine dehydratase	4h10fthf_c --> f10dhf_c + h2o_c	KZZ20_RS02185	metacyc.reaction:RXN-13908	4.2.1.96	MNXR118398	Homology
H4THDPRx	4-hydroxy-tetrahydrodipicolinate reductase	4hthdp_c + h_c + nadh_c --> h2o_c + nad_c + thdp_c	KZZ20_RS03765	metacyc.reaction:RXN-14014	1.17.1.8	MNXR108728	Homology
D78FOR	7,8-dihydrofoalte NAD oxidoreductase	f10dhf_c + h_c + nadh_c <=> 10fthf_c + nad_c		metacyc.reaction:RXN-13909	1.5.1.34	MNXR118399	Gapfilling/Literature information
SK_amob_c	S-adenosyl-4-methylsulfanyl-2-oxobutanoate sink	amob_c <=>					Gapfilling/Literature information
UDCPP	di-trans,octa-cis-undecaprenyl diphosphatase	dtpcudcpp_c + h2o_c <=> dtpcudcp_c + h_c + pi_c	KZZ20_RS02845	metacyc.reaction:UNDECAPRENYL-DIPHOSPHATASE-RXN	3.6.1.27	MNXR109723	Homology
SQLSx	Squalene synthase	2.0 frdp_c + h_c + nadh_c --> nad_c + 2.0 ppi_c + sql_c	KZZ20_RS06420	metacyc.reaction:RXN-13162	2.5.1.21	MNXR104529	Homology
ASNTRH	Asparaginyl-tRNA hydrolase	asntrna_c + h2o_c --> asn__L_c + h_c + trnaasn_c	KZZ20_RS09085 and KZZ20_RS01330	metacyc.reaction:RXN-12460	3.1.1.29	MNXR117572	Homology
RNTRA3	Ribonucleoside triphosphate reductase CTP	ctp_c + for_c + h_c --> co2_c + dctp_c + h2o_c	KZZ20_RS03465	metacyc.reaction:RXN0-723	1.1.98.6	MNXR123403	Homology
METt2rpp	L-methionine reversible transport via proton symport (periplasmic)	h_p + met__L_p <=> 2.0 h_c + met__L_c	KZZ20_RS07145 or KZZ20_RS01830				Homology
TMPPP_2	Thiamine-phosphate diphoshorylase	2c4mthzep_c + 2mahmp_c + 2.0 h_c <=> co2_c + ppi_c + thmmp_c	KZZ20_RS06065 or KZZ20_RS08655 or KZZ20_RS01505	metacyc.reaction:RXN-12611	2.5.1.3	MNXR114610	Homology
FHS	Formyl hopane systhesis	rph_c <=> fhp_c		metacyc.reaction:RXN-13530		MNXR118151	Gapfilling/Literature information
COtpp	Carbon monoxide transport via diffusion (periplasm)	co_p <=> co_c		metacyc.reaction:TRANS-RXN0-556		MNXR96863	Gapfilling/Literature information
PPANAp	Sodium-translocating pyrophosphatase	h2o_c + na1_c + ppi_c --> h_c + na1_p + 2.0 pi_c	KZZ20_RS00430	metacyc.reaction:RXN-21066	7.2.3.g	MNXR103072	Homology
DPLPTAT1	Diploptene adenosyltransferase and reductase	amet_c + dptne_c + mql8_p <=> ahop_c + h_c + met__L_c + mqn8_p	KZZ20_RS03970	metacyc.reaction:RXN-13528		MNXR118150	Homology
NADH19pp	NADH dehydrogenase (ubiquinone-8 & 4 protons) (periplasm)	5.0 h_c + nadh_c + q8_p <=> 4.0 h_p + nad_c + q8h2_p	(KZZ20_RS00395 and KZZ20_RS00400 and KZZ20_RS00405 and KZZ20_RS00410 and KZZ20_RS00415 and KZZ20_RS00420) or (KZZ20_RS00825 and KZZ20_RS00830 and KZZ20_RS00835 and KZZ20_RS00840 and KZZ20_RS00845 and KZZ20_RS00850 and KZZ20_RS00855)	metacyc.reaction:NADH-DEHYDROG-A-RXN	7.1.1.2	MNXR116078	Homology
CBPD	Carbamoyl phosphate degradation (spontaneous)	cbp_c --> cynt_c + h_c + pi_c		metacyc.reaction:RXN-17753		MNXR140691	Gapfilling/Literature information
NO2tpp	NO2 transport (diffusion)	no2_p <=> no2_c		metacyc.reaction:TRANS-RXN-137		MNXR101912	Gapfilling/Literature information
HEMEAS_2	Heme A synthase (menaquinone)	h2o_c + hemeO_c + 2.0 mqn8_p --> hemeA_c + 2.0 mql8_p	KZZ20_RS08870	metacyc.reaction:RXN-18399	1.17.99.9	MNXR100591	Homology
2PPOHtex	Iso-propanol transport via diffusion (extracellular to periplasm)	2ppoh_e <=> 2ppoh_p					Gapfilling/Literature information
COtex	Carbon monoxide transport via diffusion (extracellular to periplasm)	co_e <=> co_p					Gapfilling/Literature information
DURAD2x	Dihydrothymin dehydrogenase (NAD)	56dthm_c + nad_c <-- h_c + nadh_c + thym_c	KZZ20_RS06810	metacyc.reaction:RXN0-6565	1.3.1.1	MNXR105323	Homology
PO2OXG	pyruvic oxime dioxygenase	o2_c + pyrox_c --> h_c + no2_c + pyr_c		metacyc.reaction:RXN-3483		MNXR121672	Gapfilling/Literature information
NADPHQR3x	NADH Quinone Reductase (Menaquinone-8)	h_c + mqn8_p + nadh_c <=> mql8_p + nad_c	KZZ20_RS01740	metacyc.reaction:RXN0-7386	1.6.99.6	MNXR101892	Homology
N2ORp	Nitrous oxide reductase (cytochrome)	2.0 focytC_p + 2.0 h_p + n2o_p --> 2.0 ficytC_p + h2o_p + n2_p		metacyc.reaction:RXN-12130	1.7.2.4	MNXR140244	Gapfilling/Literature information
HAM1tpp	Hydroxylamine (H4NO to H3NO) transport via diffusion (periplasm)	ham_p <=> h_c + ham_c					Gapfilling/Literature information
CU2t3pp	Copper transport out via proton antiport (periplasm)	cu2_c + h_p --> cu2_p + h_c	KZZ20_RS04255	metacyc.reaction:TRANS-RXN0-280			Homology
MEOHDHpp	Methanol dehydrogenase (cytochrome)	2.0 ficytC_p + meoh_p --> fald_p + 2.0 focytC_p + 2.0 h_p	KZZ20_RS02200 and KZZ20_RS02195 and KZZ20_RS02190	metacyc.reaction:RXN-2861	['1.1.2.7', '1.1.2.e']	MNXR147167	Homology
CYSDES1	Cysteine desulfurase	cys__L_c + thil_c --> ala__L_c + thilS_c	KZZ20_RS02295 or KZZ20_RS08270 or KZZ20_RS05905 or KZZ20_RS05340 or KZZ20_RS01210	metacyc.reaction:RXN-9787	2.8.1.7	MNXR122991	Homology
KARA2x	Ketol-acid reductoisomerase	2ahbut_c + h_c + nadh_c --> 23dhmp_c + nad_c	KZZ20_RS07610	metacyc.reaction:ACETOOHBUTREDUCTOISOM-RXN	1.1.1.86	MNXR100902	Homology
RNTRA2	Ribonucleoside triphosphate reductase GTP	for_c + gtp_c + h_c --> co2_c + dgtp_c + h2o_c	KZZ20_RS03465	metacyc.reaction:RXN0-746	1.1.98.6	MNXR123414	Homology
M2AHTS	2-methylbacteriohopanetetrol synthase	amet_c + bhptetrol_c + mcbl3_c <=> 2mbhptetrol_c + cbl3_c + dad_5_c + met__L_c		metacyc.reaction:RXN-13532	2.1.1.-	MNXR118153	Gapfilling/Literature information
AMOq8	Ammonia monoxygenase (ubiquinol)	nh4_c + o2_p + q8h2_p --> h2o_p + ham_p + q8_p		metacyc.reaction:AMONITRO-RXN	1.14.99.39	MNXR115701	Gapfilling/Literature information
DHNAS1	1,4-dihydroxy-6-naphthoate synthase	cdhxfut_c --> dha_c + dhna_c	KZZ20_RS10575	metacyc.reaction:RXN-10622	4.1.99.M7	MNXR116421	Homology
THISST	Carboxy-adenylated ThiS-sulfur-carrier sulfutransferase	2.0 fdxrd_c + thilS_c + thisc_c --> amp_c + 2.0 fdxo_2_2_c + thil_c + thiscS_c	KZZ20_RS03390	metacyc.reaction:RXN-9788	2.8.1.-	MNXR122992	Homology
SSx	Squalene synthase (nad)	h_c + nadh_c + psqldp_c --> nad_c + ppi_c + sql_c	KZZ20_RS06420	metacyc.reaction:RXN66-281			Homology
HYD5pp	Hydrogenase (ubiquinol, no proton translocation) (periplasm)	q8h2_p <-- h2_p + q8_p	(KZZ20_RS06650 and KZZ20_RS06655 and KZZ20_RS06660 and KZZ20_RS06665) or (KZZ20_RS03120 and KZZ20_RS03125)	metacyc.reaction:RXN-22594	1.12.5.1		Homology
SUCDHm8	Succinate dehydrogenase	fum_c + mql8_p --> mqn8_p + succ_c	KZZ20_RS01605 and KZZ20_RS01610 and KZZ20_RS01615	metacyc.reaction:R601-RXN	1.3.5.4	MNXR143783	Homology
IPPOHDHpp	Isopropanol dehydrogenase (periplasm)	2ppoh_p + 2.0 ficytC_p --> acetone_p + 2.0 focytC_p + 2.0 h_p	(KZZ20_RS10350 and KZZ20_RS10345) or (KZZ20_RS02200 and KZZ20_RS02195 and KZZ20_RS02190 )				Homology
PPTGS_MF	Peptidoglycan subunit synthesis	uaagmda_p --> dtpcudcpp_c + peptido_MF_c	KZZ20_RS07500				Homology
MTHGXLtabcpp	Methylglyoxal ABC transport (periplasm)	atp_c + h2o_c + mthgxl_p --> adp_c + h_c + mthgxl_c + pi_c	KZZ20_RS09420 and KZZ20_RS09425				Homology
IG3PS_2	imidazole-glycerol-phosphate synthase	nh4_c + prlp_c --> aicar_c + eig3p_c + h2o_c + h_c	KZZ20_RS00185 or KZZ20_RS03780	metacyc.reaction:RXN-17900		MNXR151289	Homology
CDLPNS160cmp	Cardiolipin synthase 16:0 (CMP-forming)	cdpdhdecg_c + pg160_c --> clpn160_c + cmp_c + h_c	KZZ20_RS00660	metacyc.reaction:RXN-8141	2.7.8.41		Homology
PPOHtpp	Propanol transport via diffusion (periplasm to cytosol)	ppoh_p <=> ppoh_c					Gapfilling/Literature information
RHS	ribosyl hopane synthase	ahop_c + h2o_c <=> ade_c + rph_c		metacyc.reaction:RXN-13529		MNXR151004	Gapfilling/Literature information
NAtpp	Sodium proton diffusion (periplasm to cytoplasma)	na1_p --> na1_c					Gapfilling/Literature information
BHTS	Bacteriohopanetriol synthesis	fhp_c + mql8_p --> bhptetrol_c + mqn8_p		metacyc.reaction:RXN-13531		MNXR118152	Gapfilling/Literature information
RNTRA4	Ribonucleoside triphosphate reductase UTP	for_c + h_c + utp_c --> co2_c + dutp_c + h2o_c	KZZ20_RS03465	metacyc.reaction:RXN0-724	1.1.98.6	MNXR123408	Homology
DAPOPc	DATP:pyruvate 2-O-phosphotransferase	dadp_c + h_c + pep_c --> datp_c + pyr_c	KZZ20_RS00045 or KZZ20_RS07970	metacyc.reaction:RXN-14192	2.7.1.40	MNXR97145	Homology
M2TTHS	2-methyltetrahymanol synthase	amet_c + mcbl3_c + thymol_c <=> 2mthymol_c + cbl3_c + dad_5_c + met__L_c		metacyc.reaction:RXN-13534	2.1.1.-	MNXR118155	Gapfilling/Literature information
HXPDPS	Hexaprenyl diphosphate synthase ((2E,6E)-farnesyl-diphosphate specific)	frdp_c + 3.0 ipdp_c <=> hexdp_c + 3.0 ppi_c	KZZ20_RS02530 or KZZ20_RS07675	metacyc.reaction:TRANS-PENTAPRENYLTRANSFERASE-RXN	2.5.1.83	MNXR112682	Homology
CYTCBB3pp1	Cytochrome c oxidase bb3 (2 proton & 0.5 O2)	4.0 focytC_p + 8.0 h_c + o2_c --> 4.0 ficytC_p + 2.0 h2o_c + 4.0 h_p	KZZ20_RS03890 and KZZ20_RS03910 and KZZ20_RS03905 and KZZ20_RS03890 and KZZ20_RS03885	metacyc.reaction:CYTOCHROME-C-OXIDASE-RXN	7.1.1.9		Homology
CH4OXq8	Methane monooxygenase (ubiquinone)	ch4_p + o2_p + q8h2_p --> h2o_p + meoh_p + q8_p	KZZ20_RS10335 or KZZ20_RS10330	metacyc.reaction:RXN-12219	1.14.18.3	MNXR117420	Homology
CDLPNS140cmp	Cardiolipin synthase 14:0 (CMP-forming)	cdpdtdecg_c + pg140_c <=> clpn140_c + cmp_c + h_c	KZZ20_RS00660	metacyc.reaction:RXN-8141	2.7.8.41		Homology
TTHS	Tetrahymanol synthase	h2o_c + sql_c <=> thymol_c		metacyc.reaction:RXN-12337	4.2.1.123	MNXR107791	Gapfilling/Literature information
POS	Pyruvic oxide synthesis (spontaneous)	ham_c + pyr_c --> h2o_c + pyrox_c		metacyc.reaction:RXN-3482		MNXR121671	Gapfilling/Literature information
AFC	Arabinosa-5-phosphate ciclase (spontaneous)	ara5p_c <=> arafu5p_c		metacyc.reaction:RXN-16804		MNXR120392	Gapfilling/Literature information
CHORD	Chorismate dehydratase	chor_c <=> 3cv1obz_c + h2o_c	KZZ20_RS03815	metacyc.reaction:RXN-12345	4.2.1.151	MNXR113987	Homology
L3EHAA	L-erythro-3-hydroxyaspartate aldolase	glx_c + gly_c --> 3hasp__L_c		metacyc.reaction:RXN-11769	4.1.3.14	MNXR106550	Gapfilling/Literature information
C3H8OXq8	Propane monooxygenase (ubiquinone)	c3h8_p + o2_p + q8h2_p --> 2ppoh_p + h2o_p + q8_p	KZZ20_RS10810 and KZZ20_RS10800 and KZZ20_RS10805	metacyc.reaction:RXN-17568	1.14.13.227	MNXR114022	Homology
S2FE2SSx	SUF [2Fe-2S] Synthesis	atp_c + 2.0 fe2_c + h2o_c + nadh_c + sufbcd_c + 2.0 sufsesh_c --> adp_c + 6.0 h_c + nad_c + pi_c + sufbcd_2fe2s_c + 2.0 sufse_c				MNXR104150	Gapfilling/Literature information
PAPPT4	Phospho-N-acetylmuramoyl-pentapeptide-transferase (meso-2,6-diaminopimelate)	dtpcudcp_c + ugmda_c <=> uagmda_c + ump_c	KZZ20_RS09180	metacyc.reaction:PHOSNACMURPENTATRANS-RXN	2.7.8.13	MNXR109725	Homology
CBL1MT	Cob(1)alamin methyltransferase	amet_c + cbl1_c --> ahcys_c + mcbl3_c				MNXR120741	Gapfilling/Literature information
M2DPTS	2-methyldiplopterol synthase	amet_c + dpterol_c + mcbl3_c <=> 2mdpterol_c + cbl3_c + dad_5_c + met__L_c		metacyc.reaction:RXN-13535	2.1.1.-	MNXR118156	Gapfilling/Literature information

## Sheet: Supp. Table S9
Summary of flux sampling results using Propane as substrate
rxn_id	median_flux_ch4	median_flux	log2FC	moods-value	KS-value
GK1	0.000571525	0.000544845	-0.0689694	0.1237	0.1237
G1PACT	0.00063826	0.000531323	-0.264556	0.1062	0.1062
NTRIR2x	-0.00595835	-0.00796611	0.418962	0.1055	0.1055
3OAS60	0.00953071	0.00908581	-0.0689694	0.1237	0.1237
ORPT	0.00110859	0.00105635	-0.0696291	0.1243	0.1243
ADSL2r	0.0011513	0.00109756	-0.0689694	0.1237	0.1237
OMPDC	0.00110859	0.00105635	-0.0696291	0.1243	0.1243
KDOPS	4.379e-05	4.17458e-05	-0.0689694	0.1237	0.1237
SUCOAS	-0.0224333	-0.0458837	1.03234	0.2906	0.2906
MDH	0.166163	0.233886	0.4932	0.3169	0.3169
SBP	0.469611	0.149594	-1.65042	0.6445	0.6445
ATPS4rpp	-7.82013	-8.91407	0.188892	0.8374	0.8374
H4THDPS	0.00411626	0.00392411	-0.0689694	0.1237	0.1237
FBA3	-0.469611	-0.149594	-1.65042	0.6445	0.6445
PPCK	0.125609	0.126025	0.00476904	0.0481	0.0481
PGAMT	0.00063826	0.000531323	-0.264556	0.1062	0.1062
DCTPD2	0.123759	0.0982368	-0.333201	0.1156	0.1156
GARFT	0.0011524	0.0010986	-0.0689694	0.1237	0.1237
PT4ACAMDASE	0.00135858	0.00129516	-0.0689694	0.1237	0.1237
H4THDPRx	0.00204676	0.00201364	-0.0235378	0.0365	0.0365
H4THDPR	0.00184203	0.00178037	-0.0491151	0.0411	0.0411
THD2pp	-0.37798	-0.297334	-0.346223	0.0885	0.0885
PUNP5	0.0222096	0.0168838	-0.395545	0.1099	0.1099
ASPTRS	0.00130275	0.00124194	-0.0689694	0.1237	0.1237
GLYCL	0.0186602	0.784528	5.39379	0.9985	0.9985
KAS15	0.00953071	0.00908581	-0.0689694	0.1237	0.1237
PHETA1	-0.00366851	-0.00349725	-0.0689694	0.1237	0.1237
NTP3	0.152172	0.110803	-0.457707	0.1608	0.1608
UAPGR	0.000580217	0.000553132	-0.0689694	0.1237	0.1237
HCYSMT	0.0569564	0.0416187	-0.452624	0.1691	0.1691
ICL	0.03535	0.0546547	0.628634	0.2088	0.2088
SPP	0.000284635	0.000271348	-0.0689694	0.1237	0.1237
SPS	0.000284635	0.000271348	-0.0689694	0.1237	0.1237
IPMD	0.00339372	0.0032353	-0.0689694	0.1237	0.1237
G1SAT	3.87979e-05	3.69868e-05	-0.0689694	0.1237	0.1237
GALUi	0.000284635	0.000271348	-0.0689694	0.1237	0.1237
RBPC	1.01882	0.0503081	-4.33997	0.9962	0.9962
PPM	0.116465	0.0893099	-0.383003	0.1638	0.1638
EAR60x	0.00471979	0.00473608	0.00496941	0.0265	0.0265
DAPAT_h	-0.00411626	-0.00392411	-0.0689694	0.1237	0.1237
UAGAAT	4.379e-05	4.17458e-05	-0.0689694	0.1237	0.1237
MEPCT	0.00587399	0.00559978	-0.0689694	0.1237	0.1237
SHKK	0.00446752	0.00425897	-0.0689694	0.1237	0.1237
DDPA	0.00446752	0.00425897	-0.0689694	0.1237	0.1237
EAR120x	0.00953071	0.00908581	-0.0689694	0.1237	0.1237
FACOAL120t2pp	0.0435264	0.0348439	-0.320987	0.0867	0.0867
DHORTS	0.00110859	0.00105635	-0.0696291	0.1243	0.1243
PRAIS	0.0011524	0.0010986	-0.0689694	0.1237	0.1237
GAPDy	1.94726	0.422057	-2.20593	0.9939	0.9939
3HAD100	0.00953071	0.00908581	-0.0689694	0.1237	0.1237
3OAR80	0.00953071	0.00908581	-0.0689694	0.1237	0.1237
GLUDxi	0.86713	0.669691	-0.372752	0.172	0.172
MCOATA	0.0696475	0.0663963	-0.0689694	0.1237	0.1237
DURIPP	0.0704743	0.0443362	-0.668613	0.2812	0.2812
RNDR3	0.00275834	0.00114386	-1.26989	0.3703	0.3703
GLYCLTDy	0.012877	0.0137628	0.0959783	0.0302	0.0302
3HAD160	0.00814423	0.00776405	-0.0689694	0.1237	0.1237
3OAR160	0.00814423	0.00776405	-0.0689694	0.1237	0.1237
CHORM	0.00366851	0.00349725	-0.0689694	0.1237	0.1237
3HAD140	0.00944313	0.00900232	-0.0689694	0.1237	0.1237
NDPK1	0.108717	0.0761968	-0.512777	0.1485	0.1485
ACGAM6PS	0.000517787	0.000588403	0.184444	0.0814	0.0814
ACGAMPM	0.000517787	0.000588403	0.184444	0.0814	0.0814
DMPPS1	0.00238883	0.00237513	-0.00829841	0.0234	0.0234
3HAD120_1	0.00953071	0.00908581	-0.0689694	0.1237	0.1237
TRDR	0.0329983	0.0206822	-0.674001	0.1992	0.1992
ASPTA	-0.0472464	-0.0411603	-0.198952	0.119	0.119
SADT	0.00136669	0.00130289	-0.0689694	0.1237	0.1237
TRPS1	0.00078822	0.000751424	-0.0689694	0.1237	0.1237
3OAR120	0.00953071	0.00908581	-0.0689694	0.1237	0.1237
IPPMIa	-0.00339372	-0.0032353	-0.0689694	0.1237	0.1237
LDH_L	-0.00640332	-0.0072658	0.182301	0.0472	0.0472
3OAR100	0.00953071	0.00908581	-0.0689694	0.1237	0.1237
PRATPP	0.00100717	0.000960153	-0.0689694	0.1237	0.1237
3HAD80	0.00953071	0.00908581	-0.0689694	0.1237	0.1237
GLUTRR	3.87979e-05	3.69868e-05	-0.0689694	0.1237	0.1237
DMPPS	0.0032248	0.00307366	-0.0692542	0.0614	0.0614
3OAS160	0.00814423	0.00776405	-0.0689694	0.1237	0.1237
ARGSL	0.00798782	0.00809793	0.0197514	0.0106	0.0106
PFK	0.101988	0.0729168	-0.484071	0.1262	0.1262
NDPK3	0.00559474	0.00696785	0.316642	0.296	0.296
HISTP	0.00100717	0.000960153	-0.0689694	0.1237	0.1237
TKT1	0.413392	0.0997745	-2.05077	0.9897	0.9897
AKGDH	0.0185833	0.0441464	1.24829	0.3036	0.3036
ACCOAC	0.0696475	0.0663963	-0.0689694	0.1237	0.1237
ANPRT	0.00078822	0.000751424	-0.0689694	0.1237	0.1237
3HAD60	0.00953071	0.00908581	-0.0689694	0.1237	0.1237
H2CO3D	-0.41307	-0.318681	-0.374274	0.2228	0.2228
TKT2	-0.418054	-0.104073	-2.00609	0.9897	0.9897
NDPK2	0.0730437	0.0468294	-0.641347	0.2831	0.2831
ARGSS	0.00798782	0.00809793	0.0197514	0.0106	0.0106
HXPRT	0.0222108	0.016885	-0.395524	0.1099	0.1099
MTHFC	2.76497	1.6223	-0.769221	0.9961	0.9961
ALDD2x	0.0594064	0.0363561	-0.708421	0.2028	0.2028
ASPK	0.00751348	0.00716275	-0.0689694	0.1237	0.1237
3OAR140	0.00953071	0.00908581	-0.0689694	0.1237	0.1237
ALAD_L	-0.00560402	-0.00534242	-0.0689694	0.1237	0.1237
PPA	0.718158	0.530063	-0.438136	0.3887	0.3887
UGMDDS	0.000580217	0.000553132	-0.0689694	0.1237	0.1237
FDH	3.40564	1.53202	-1.15249	0.9988	0.9988
PYK3	0.0502589	0.0401551	-0.323795	0.0984	0.0984
IGPS	0.00078822	0.000751424	-0.0689694	0.1237	0.1237
PGCD	0.128998	0.889521	2.78568	0.9974	0.9974
GMPS2	0.000571525	0.000544845	-0.0689694	0.1237	0.1237
L3EHAA	0.0201087	0.0369497	0.877744	0.2455	0.2455
L3EHAAL	0.0201087	0.0369497	0.877744	0.2455	0.2455
PRAI	0.00078822	0.000751424	-0.0689694	0.1237	0.1237
ACOTA	-0.00798782	-0.00809793	0.0197514	0.0106	0.0106
THRS	0.0023975	0.00228558	-0.0689694	0.1237	0.1237
SSALx	0.0254196	0.038702	0.606466	0.218	0.218
MTHFD_1	2.76497	1.6223	-0.769221	0.9961	0.9961
G3PAT160	0.00132257	0.00126083	-0.0689694	0.1237	0.1237
CBPS	0.0452839	0.037791	-0.260958	0.1032	0.1032
CS	0.117909	0.187803	0.671544	0.425	0.425
Kabcpp	0.00192676	0.00183682	-0.0689694	0.1237	0.1237
DPLPTAT1	8.758e-05	8.34916e-05	-0.0689694	0.1237	0.1237
PGM	0.0205572	1.16647	5.82637	1	1
MTHFR3	-0.00101402	-0.000966687	-0.0689694	0.1237	0.1237
SHK3Dr	0.00446752	0.00425897	-0.0689694	0.1237	0.1237
SERDA	0.0587501	0.0364634	-0.688142	0.176	0.176
GF6PTA	0.00120422	0.00114801	-0.0689694	0.1237	0.1237
PGCM	-0.00156549	-0.00149241	-0.0689694	0.1237	0.1237
ASPCT	0.00110859	0.00105635	-0.0696291	0.1243	0.1243
NADH16pp	4.12944	4.96696	0.266415	0.9033	0.9033
AIRC3	0.0931403	0.0686689	-0.439749	0.1166	0.1166
IMPC	0.00215847	0.00205771	-0.0689694	0.1237	0.1237
PGK	1.94726	0.422057	-2.20593	0.9939	0.9939
ACLS	0.00610126	0.00581644	-0.0689694	0.1237	0.1237
TALA	0.0589254	0.0523125	-0.171732	0.2257	0.2257
IMPD	0.000571525	0.000544845	-0.0689694	0.1237	0.1237
DHQS	0.00446752	0.00425897	-0.0689694	0.1237	0.1237
AIRCr	0.0918706	0.0675302	-0.444069	0.1164	0.1164
DHQTi	0.00446752	0.00425897	-0.0689694	0.1237	0.1237
AIRC2	0.0931403	0.0686689	-0.439749	0.1166	0.1166
3OAS120	0.00953071	0.00908581	-0.0689694	0.1237	0.1237
3HAD40_2	0.00953071	0.00908581	-0.0689694	0.1237	0.1237
HISTD	0.00100717	0.000960153	-0.0689694	0.1237	0.1237
PRAMPC	0.00100717	0.000960153	-0.0689694	0.1237	0.1237
ACYP_2	0.0504622	0.0385547	-0.388298	0.1097	0.1097
FALTHFL	2.68944	8.10755e-07	-21.6615	1	1
DXPS	0.00587752	0.00560315	-0.0689694	0.1237	0.1237
APSR	0.00136669	0.00130289	-0.0689694	0.1237	0.1237
FBA	-0.406678	-0.165648	-1.29577	0.5296	0.5296
CYTK1	0.00881246	0.00840124	-0.0689423	0.1237	0.1237
AICART	0.00215847	0.00205771	-0.0689694	0.1237	0.1237
EAR180y	0.00220215	0.00214889	-0.0353239	0.0324	0.0324
RBCh	0.0128687	0.0137553	0.0961236	0.0302	0.0302
UM3PL	0.000580217	0.000553132	-0.0689694	0.1237	0.1237
EAR140x_1	0.00944313	0.00900232	-0.0689694	0.1237	0.1237
UAGCVT	0.000580217	0.000553132	-0.0689694	0.1237	0.1237
NH4tpp_1	0.0648029	0.0601696	-0.107022	0.127	0.127
RNTR3	0.0284826	0.0178403	-0.674938	0.1789	0.1789
ADSS	0.0237874	0.0184475	-0.366772	0.1104	0.1104
HSK	0.0023975	0.00228558	-0.0689694	0.1237	0.1237
KARA1	0.00610126	0.00581644	-0.0689694	0.1237	0.1237
EAR60y	0.00442727	0.00409789	-0.111537	0.0465	0.0465
ADK1	0.846187	1.76375	1.0596	0.9423	0.9423
DXPRIi	0.00587399	0.00559978	-0.0689694	0.1237	0.1237
EAR80y	0.00540285	0.00445962	-0.276798	0.1382	0.1382
CDPMEK	0.00587399	0.00559978	-0.0689694	0.1237	0.1237
HMBDPO	0.00587399	0.00559978	-0.0689694	0.1237	0.1237
GLUPRT	0.0011524	0.0010986	-0.0689694	0.1237	0.1237
TPI	0.890666	0.328731	-1.43798	0.9812	0.9812
PSP_L	0.128998	0.889521	2.78568	0.9974	0.9974
EAR40y	0.00490179	0.00445622	-0.137486	0.0597	0.0597
UMPK	0.0722081	0.0459957	-0.650661	0.2821	0.2821
3OAS100	0.00953071	0.00908581	-0.0689694	0.1237	0.1237
CYNL	0.0322823	0.0248054	-0.380086	0.0986	0.0986
SQLS	0.000215563	0.000196409	-0.134248	0.0406	0.0406
SQLSx	0.000227322	0.000181662	-0.323482	0.091	0.091
PSERT	-0.128998	-0.889521	2.78568	0.9974	0.9974
G6PDH2r	0.0357605	0.103186	1.52881	0.3919	0.3919
PPS	0.195162	1.27505	2.70781	0.9981	0.9981
IPPS	0.00339372	0.0032353	-0.0689694	0.1237	0.1237
3OAR40	0.00953071	0.00908581	-0.0689694	0.1237	0.1237
NDPK7	0.00275834	0.00114386	-1.26989	0.3703	0.3703
MOBDabc	3.45722e-05	3.29583e-05	-0.0689694	0.1237	0.1237
MG2uabcpp	0.000766325	0.000730552	-0.0689694	0.1237	0.1237
3OAR60	0.00953071	0.00908581	-0.0689694	0.1237	0.1237
GLNS	0.251708	0.188348	-0.418352	0.2081	0.2081
SO4t2pp	0.00136669	0.00130289	-0.0689694	0.1237	0.1237
CYSS	0.00136669	0.00130289	-0.0689694	0.1237	0.1237
FACOAE120	0.0435264	0.0348439	-0.320987	0.0867	0.0867
atpm	3.60551	3.57163	-0.0136207	0.1382	0.1382
ADA	0.0222096	0.0168838	-0.395545	0.1099	0.1099
RNTRA3	0.026678	0.0172671	-0.627622	0.1654	0.1654
METAT	0.0570596	0.0417279	-0.451456	0.1691	0.1691
CTPS1	0.129954	0.093062	-0.481732	0.1516	0.1516
PRFGS	0.0011524	0.0010986	-0.0689694	0.1237	0.1237
UAAGMDAt2	0.000580217	0.000553132	-0.0689694	0.1237	0.1237
SQLC	8.758e-05	8.34916e-05	-0.0689694	0.1237	0.1237
CTPS2	0.0570923	0.0418725	-0.447291	0.1259	0.1259
GLUTRS	3.87979e-05	3.69868e-05	-0.0689694	0.1237	0.1237
ANS	0.00078822	0.000751424	-0.0689694	0.1237	0.1237
ADPT	0.0247831	0.0176739	-0.487735	0.1181	0.1181
AHCi	0.056969	0.0416321	-0.452481	0.1691	0.1691
ASNTRH	0.00130275	0.00124194	-0.0689694	0.1237	0.1237
UAMAGS	0.000580217	0.000553132	-0.0689694	0.1237	0.1237
PEPC	0.0983189	0.0704646	-0.480569	0.1387	0.1387
TTHS	0.000448847	0.000427894	-0.0689694	0.1237	0.1237
AHTS	8.758e-05	8.34916e-05	-0.0689694	0.1237	0.1237
FHS	8.758e-05	8.34916e-05	-0.0689694	0.1237	0.1237
EAR180x	0.00193642	0.00182019	-0.0893035	0.0505	0.0505
AGPR	0.00798782	0.00809793	0.0197514	0.0106	0.0106
RHS	8.758e-05	8.34916e-05	-0.0689694	0.1237	0.1237
GHMT2r	0.0509397	0.837574	4.03935	0.9985	0.9985
PRPPS	0.202417	0.1461	-0.470374	0.2889	0.2889
PKETX	0.177522	0.272986	0.620832	0.4291	0.4291
EAR40x	0.00415392	0.00435651	0.0687002	0.0313	0.0313
3HAD180	0.00431572	0.00411426	-0.0689694	0.1237	0.1237
DRPA	0.0704743	0.0443362	-0.668613	0.2812	0.2812
ORNTAC	0.00798782	0.00809793	0.0197514	0.0106	0.0106
PUNP1	0.0246835	0.0175721	-0.490259	0.1181	0.1181
G5SADs	-0.00388636	-0.00370494	-0.0689694	0.1237	0.1237
PRASCSi	0.0011513	0.00109756	-0.0689694	0.1237	0.1237
ACONT	0.117897	0.187794	0.671619	0.425	0.425
CAT	0.00315815	0.00323744	0.0357746	0.0123	0.0123
AFC	4.379e-05	4.17458e-05	-0.0689694	0.1237	0.1237
KDOCT2	4.379e-05	4.17458e-05	-0.0689694	0.1237	0.1237
3OAS180	0.00431572	0.00411426	-0.0689694	0.1237	0.1237
DHORD2	0.000534899	0.000546781	0.0316961	0.0176	0.0176
NADPHQR3	0.186828	0.0914205	-1.03112	0.2543	0.2543
ACGK	0.00798782	0.00809793	0.0197514	0.0106	0.0106
SUCDHm8	-0.0901599	-0.160785	0.834572	0.427	0.427
UAGDP	0.00120422	0.00114801	-0.0689694	0.1237	0.1237
ALCD2x	-0.00608881	-0.00606872	-0.00476893	0.0165	0.0165
PGL	0.0357605	0.103186	1.52881	0.3919	0.3919
EAR100x	0.00953071	0.00908581	-0.0689694	0.1237	0.1237
3OAR180	0.00431572	0.00411426	-0.0689694	0.1237	0.1237
A5PISO	4.379e-05	4.17458e-05	-0.0689694	0.1237	0.1237
ATPPRT	-0.00100717	-0.000960153	-0.0689694	0.1237	0.1237
UAMAS	0.000580217	0.000553132	-0.0689694	0.1237	0.1237
PRAGSr	0.0011524	0.0010986	-0.0689694	0.1237	0.1237
DAPDC	0.00353604	0.00337097	-0.0689694	0.1237	0.1237
IPDDI	-0.000499508	-0.000526279	0.0753202	0.0375	0.0375
DHAD1	0.00610126	0.00581644	-0.0689694	0.1237	0.1237
KDOPP	4.379e-05	4.17458e-05	-0.0689694	0.1237	0.1237
OCBT	0.00798782	0.00809793	0.0197514	0.0106	0.0106
EAR160x	0.00814423	0.00776405	-0.0689694	0.1237	0.1237
3OAS80	0.00953071	0.00908581	-0.0689694	0.1237	0.1237
UAGPT3	0.000580217	0.000553132	-0.0689694	0.1237	0.1237
UPPRT	0.129114	0.0908188	-0.507581	0.2391	0.2391
DHAD2	0.00202529	0.00193074	-0.0689694	0.1237	0.1237
GLU5K	0.10297	0.0803156	-0.358466	0.1003	0.1003
PPNDH	0.00366851	0.00349725	-0.0689694	0.1237	0.1237
PRMICI	0.00100717	0.000960153	-0.0689694	0.1237	0.1237
GLUDC	0.0150907	0.0283715	0.910787	0.2342	0.2342
ERTHMMOR	0.00202529	0.00193074	-0.0689694	0.1237	0.1237
MALS	0.0277724	0.0276128	-0.0083109	0.0331	0.0331
G3PD1	0.0017365	0.00170282	-0.0282632	0.0325	0.0325
G3PD2	0.00220338	0.00211573	-0.0585599	0.0513	0.0513
HSTPT	-0.00100717	-0.000960153	-0.0689694	0.1237	0.1237
MCITD	0.00202529	0.00193074	-0.0689694	0.1237	0.1237
PGI	-0.0373302	-0.104732	1.48829	0.3916	0.3916
KARA2x	0.00100944	0.00094625	-0.0932571	0.0457	0.0457
ENO	-0.0206076	-1.16653	5.82291	1	1
UDCPP	0.000580217	0.000553132	-0.0689694	0.1237	0.1237
FE2Gabcpp	6.944e-05	6.61984e-05	-0.0689694	0.1237	0.1237
EAR80x	0.00370198	0.00435082	0.232989	0.0992	0.0992
ILETA	0.00202529	0.00193074	-0.0689694	0.1237	0.1237
ALAR	0.00116043	0.00110626	-0.0689694	0.1237	0.1237
DHORD5	0.000523296	0.000472658	-0.146831	0.0638	0.0638
KARI_23dhmb	0.000941633	0.000932593	-0.0139167	0.0279	0.0279
ADSL1r	0.0237874	0.0184475	-0.366772	0.1104	0.1104
SULR	0.00136669	0.00130289	-0.0689694	0.1237	0.1237
LEUTAi	-0.00339372	-0.0032353	-0.0689694	0.1237	0.1237
ACS	0.247037	0.179686	-0.459252	0.2045	0.2045
UHGADA	4.379e-05	4.17458e-05	-0.0689694	0.1237	0.1237
MHPGLUT	0.00063684	0.000484179	-0.395389	0.1736	0.1736
ARGDC	0.00631341	0.00647287	0.0359864	0.0123	0.0123
VALTA	-0.00270403	-0.0025778	-0.0689694	0.1237	0.1237
ASNS1	0.00130275	0.00124194	-0.0689694	0.1237	0.1237
U23GAAT	4.379e-05	4.17458e-05	-0.0689694	0.1237	0.1237
GND	0.0357592	0.103184	1.52884	0.3919	0.3919
PHEH	0.00135858	0.00129516	-0.0689694	0.1237	0.1237
PAPPT4	0.000580217	0.000553132	-0.0689694	0.1237	0.1237
G5SD	0.10297	0.0803156	-0.358466	0.1003	0.1003
D78FOR	0.00135858	0.00129516	-0.0689694	0.1237	0.1237
GLUDy	0.970025	1.54595	0.672404	0.5244	0.5244
GLUSy	0.0974278	0.0683287	-0.511842	0.1213	0.1213
RPI	0.334078	0.0466082	-2.84153	0.962	0.962
3OAS140	0.00953071	0.00908581	-0.0689694	0.1237	0.1237
SS	-0.000153028	-0.000195391	0.352566	0.1031	0.1031
SSx	0.000180595	0.00017322	-0.0601585	0.0372	0.0372
FBP	0.545535	0.261707	-1.05972	0.5039	0.5039
IG3PS_2	0.000651365	0.000960153	0.5598	0.5629	0.5629
FUM	-0.1348	-0.198396	0.557561	0.3564	0.3564
PSPPS	0.000408392	0.000445821	0.126511	0.0688	0.0688
HSDH	0.00175686	0.00155129	-0.179528	0.0893	0.0893
HSDy	0.0014847	0.00160114	0.108924	0.047	0.047
ICHDx	0.074399	0.118241	0.66838	0.3715	0.3715
SERAT	0.00136669	0.00130289	-0.0689694	0.1237	0.1237
APDH	0.0587501	0.0364634	-0.688142	0.176	0.176
ASAD	-0.00751348	-0.00716275	-0.0689694	0.1237	0.1237
PYNP2r	0.0456335	0.0353785	-0.367221	0.0909	0.0909
PRUK	1.03704	0.070504	-3.87863	0.9961	0.9961
ALAALAr	0.000580217	0.000553132	-0.0689694	0.1237	0.1237
PSCVT	0.00446752	0.00425897	-0.0689694	0.1237	0.1237
IGPDH	0.00100717	0.000960153	-0.0689694	0.1237	0.1237
ACHBS	0.00202529	0.00193074	-0.0689694	0.1237	0.1237
DCYTD	0.0704743	0.0443362	-0.668613	0.2812	0.2812
P5CRx	0.00178667	0.00193729	0.116763	0.0548	0.0548
P5CR	0.00190829	0.00164954	-0.21022	0.0853	0.0853
FA160ACPHi	0.00148339	0.00141414	-0.0689694	0.1237	0.1237
MECDPS	0.00587399	0.00559978	-0.0689694	0.1237	0.1237
PYK	0.0920075	0.074532	-0.303891	0.0923	0.0923
CITMS	0.00202529	0.00193074	-0.0689694	0.1237	0.1237
CYTCBB3pp1	2.51636	2.5584	0.0239039	0.1517	0.1517
DAPE	0.00411626	0.00392411	-0.0689694	0.1237	0.1237
CHORS	0.00446752	0.00425897	-0.0689694	0.1237	0.1237
ACKr	-0.100067	-0.0817449	-0.29177	0.0909	0.0909
CITCIb	0.00202529	0.00193074	-0.0689694	0.1237	0.1237
PIuabcpp	0.012711	0.0121176	-0.0689694	0.1237	0.1237
NTPP3	0.0704743	0.0443362	-0.668613	0.2812	0.2812
PUTA3	0.099072	0.0765089	-0.372851	0.0994	0.0994
DMATT	0.00195216	0.00186103	-0.0689694	0.1237	0.1237
GRTT	0.00195216	0.00186103	-0.0689694	0.1237	0.1237
MEOHDHpp	3.44653	1.04365e-06	-21.6551	1	1
GLUR	0.000580217	0.000553132	-0.0689694	0.1237	0.1237
FA180ACPH	0.00167059	0.0015926	-0.0689694	0.1237	0.1237
FA140ACPHi	0.00050249	0.000479033	-0.0689694	0.1237	0.1237
OOR3r	0.00387707	0.00184602	-1.07055	0.2995	0.2995
POR_syn	0.00734504	0.00885832	0.270263	0.2118	0.2118
NTD3pp	0.0704743	0.0443362	-0.668613	0.2812	0.2812
PSD180	0.000428047	0.000408065	-0.0689694	0.1237	0.1237
PSD160	0.000379878	0.000362145	-0.0689694	0.1237	0.1237
PSD140	0.00012918	0.00012315	-0.0689694	0.1237	0.1237
PSSA180	0.000438009	0.000417562	-0.0689694	0.1237	0.1237
PSSA160	0.000388724	0.000370578	-0.0689694	0.1237	0.1237
PSSA140	0.00013218	0.00012601	-0.0689694	0.1237	0.1237
DASYN180	0.00132257	0.00126083	-0.0689694	0.1237	0.1237
DASYN160	0.00117256	0.00111783	-0.0689694	0.1237	0.1237
DASYN140	0.000398204	0.000379615	-0.0689694	0.1237	0.1237
AGPAT180	0.00132257	0.00126083	-0.0689694	0.1237	0.1237
AGPAT160	0.00117256	0.00111783	-0.0689694	0.1237	0.1237
AGPAT140	0.000398204	0.000379615	-0.0689694	0.1237	0.1237
G3PAT180	0.00117256	0.00111783	-0.0689694	0.1237	0.1237
G3PAT140	0.000398204	0.000379615	-0.0689694	0.1237	0.1237
PGPP180	0.000588975	0.000561481	-0.0689694	0.1237	0.1237
PGPP160	0.000522195	0.000497819	-0.0689694	0.1237	0.1237
PGSA180	0.000588975	0.000561481	-0.0689694	0.1237	0.1237
PGSA160	0.000522195	0.000497819	-0.0689694	0.1237	0.1237
CDLPNS140cmp	8.86747e-05	8.45353e-05	-0.0689694	0.1237	0.1237
FTHFD	0.0995741	0.0718971	-0.469837	0.1381	0.1381
PPTGS_MF	0.000580217	0.000553132	-0.0689694	0.1237	0.1237
PGPP140	0.000177349	0.000169071	-0.0689694	0.1237	0.1237
PGSA140	0.000177349	0.000169071	-0.0689694	0.1237	0.1237
CDLPNS180cmp	0.000295582	0.000281784	-0.0689694	0.1237	0.1237
CDLPNS160cmp	0.000261645	0.000249431	-0.0689694	0.1237	0.1237
CYO1_KT	0.817429	2.81327	1.78308	0.9953	0.9953
FE2tex	6.944e-05	6.61984e-05	-0.0689694	0.1237	0.1237
Ktex	0.00192676	0.00183682	-0.0689694	0.1237	0.1237
NH4tex	0.254872	0.213953	-0.252481	0.1767	0.1767
MG2tex	0.000766325	0.000730552	-0.0689694	0.1237	0.1237
NAtex	0.000426952	0.000407022	-0.0689694	0.1237	0.1237
PItex	0.012711	0.0121176	-0.0689694	0.1237	0.1237
SO4tex	0.00136669	0.00130289	-0.0689694	0.1237	0.1237
MOBDtex	3.45722e-05	3.29583e-05	-0.0689694	0.1237	0.1237
CO2tex	-2.69712	-2.72655	0.0156581	0.1055	0.1055
CO2tpp	-2.69712	-2.72655	0.0156581	0.1055	0.1055
H2Otex	-6.26795	-4.0056	-0.645974	0.9995	0.9995
H2Otpp	-3.44277	-1.59526	-1.10978	0.999	0.999
O2tex	6.18726	5.04567	-0.294257	0.9985	0.9985
O2tpp	2.54154	2.58258	0.0231083	0.1486	0.1486
CU2t5pp	0.000109475	0.000104365	-0.0689694	0.1237	0.1237
CU2tex	0.000109475	0.000104365	-0.0689694	0.1237	0.1237
CA2tex	0.000109475	0.000104365	-0.0689694	0.1237	0.1237
CLtex	0.00234276	0.0022334	-0.0689694	0.1237	0.1237
AGDI_1	0.00631341	0.00647287	0.0359864	0.0123	0.0123
CMPA_1	0.00631341	0.00647287	0.0359864	0.0123	0.0123
ABTA	0.0254196	0.038702	0.606466	0.218	0.218
GGPTRCS	0.00631341	0.00647287	0.0359864	0.0123	0.0123
GGPTRCO	0.00631341	0.00647287	0.0359864	0.0123	0.0123
GGGABADr	0.00631341	0.00647287	0.0359864	0.0123	0.0123
GGGABAH	0.00631341	0.00647287	0.0359864	0.0123	0.0123
GLGC	0.00128086	0.00122106	-0.0689694	0.1237	0.1237
GLCS1	0.00128086	0.00122106	-0.0689694	0.1237	0.1237
FALDtpp	2.68944	8.10755e-07	-21.6615	1	1
ATPS1	0.443048	0.362325	-0.290177	0.1596	0.1596
PGLYCP	0.0128687	0.0137553	0.0961236	0.0302	0.0302
NAtpp	0.000426952	0.000407022	-0.0689694	0.1237	0.1237
CA2abcpp	0.000109475	0.000104365	-0.0689694	0.1237	0.1237
CLtipp	0.00234276	0.0022334	-0.0689694	0.1237	0.1237
NTD2	0.0456335	0.0353785	-0.367221	0.0909	0.0909
PPM2	0.0704743	0.0443362	-0.668613	0.2812	0.2812
FORtex	-0.0622961	-0.0427431	-0.543449	0.1454	0.1454
SUCCt1pp	-0.00683346	-0.0055851	-0.291033	0.0689	0.0689
SUCCtex	-0.00683346	-0.0055851	-0.291033	0.0689	0.0689
AKGtex	-0.0035595	-0.00431532	0.277792	0.07	0.07
AKGt2rpp	-0.0035595	-0.00431532	0.277792	0.07	0.07
ACt2rpp	-0.00916932	-0.0103708	0.177634	0.0542	0.0542
ACtex	-0.00916932	-0.0103708	0.177634	0.0542	0.0542
PYRt2rpp	-0.00736579	-0.00868707	0.23803	0.0595	0.0595
PYRtex	-0.00736579	-0.00868707	0.23803	0.0595	0.0595
L_LACtex	-0.00640332	-0.0072658	0.182301	0.0472	0.0472
L_LACt2rpp	-0.00640332	-0.0072658	0.182301	0.0472	0.0472
ETOHtex	-0.00608881	-0.00606872	-0.00476893	0.0165	0.0165
ETOHtrpp	-0.00608881	-0.00606872	-0.00476893	0.0165	0.0165
HSST	0.000999725	0.000953057	-0.0689694	0.1237	0.1237
SHSL1	0.000999725	0.000953057	-0.0689694	0.1237	0.1237
CYSTL	0.000999725	0.000953057	-0.0689694	0.1237	0.1237
METS	0.00032672	0.000446595	0.450912	0.1435	0.1435
FTHFLi	-2.63924	-1.51934	-0.796681	0.9902	0.9902
FALDHpp	0.743218	2.07544e-07	-21.7719	1	1
CBMD	0.0322823	0.0248054	-0.380086	0.0986	0.0986
CBPD	0.0322823	0.0248054	-0.380086	0.0986	0.0986
AMOq8	0.189188	0.153653	-0.300149	0.1566	0.1566
HAO1pp	0.189188	0.153653	-0.300149	0.1566	0.1566
NITR_NOpp	-0.0637431	-0.054568	-0.224214	0.0905	0.0905
NORpp	0.0197676	0.0154581	-0.354773	0.102	0.102
NO2tpp	0.00595835	0.00796611	0.418962	0.1055	0.1055
NO2tex	-0.0547076	-0.0425583	-0.362299	0.1024	0.1024
N2Otex	-0.0197676	-0.0154581	-0.354773	0.102	0.102
NOtex	-0.0460492	-0.0378855	-0.281531	0.0764	0.0764
BIOMASS_Mfumariolicum_Pic	0.0118952	0.01134	-0.0689694	0.1237	0.1237
DM_biomass	0.0118952	0.01134	-0.0689694	0.1237	0.1237
DM_cyt554red_p	0.567564	0.460958	-0.300149	0.1566	0.1566
SK_cyt554oxi_p	-0.567564	-0.460958	-0.300149	0.1566	0.1566
EX_o2_e	-6.18726	-5.04567	-0.294257	0.9985	0.9985
EX_nh4_e	-0.254872	-0.213953	-0.252481	0.1767	0.1767
EX_h2o_e	6.26795	4.0056	-0.645974	0.9995	0.9995
EX_h_e	0.886095	0.72465	-0.290177	0.1596	0.1596
EX_pi_e	-0.012711	-0.0121176	-0.0689694	0.1237	0.1237
EX_so4_e	-0.00136669	-0.00130289	-0.0689694	0.1237	0.1237
EX_fe2_e	-6.944e-05	-6.61984e-05	-0.0689694	0.1237	0.1237
EX_mg2_e	-0.000766325	-0.000730552	-0.0689694	0.1237	0.1237
EX_k_e	-0.00192676	-0.00183682	-0.0689694	0.1237	0.1237
EX_na1_e	-0.000426952	-0.000407022	-0.0689694	0.1237	0.1237
EX_mobd_e	-3.45722e-05	-3.29583e-05	-0.0689694	0.1237	0.1237
EX_cu2_e	-0.000109475	-0.000104365	-0.0689694	0.1237	0.1237
EX_ca2_e	-0.000109475	-0.000104365	-0.0689694	0.1237	0.1237
EX_cl_e	-0.00234276	-0.0022334	-0.0689694	0.1237	0.1237
EX_co2_e	2.69712	2.72655	0.0156581	0.1055	0.1055
EX_for_e	0.0622961	0.0427431	-0.543449	0.1454	0.1454
EX_succ_e	0.00683346	0.0055851	-0.291033	0.0689	0.0689
EX_akg_e	0.0035595	0.00431532	0.277792	0.07	0.07
EX_ac_e	0.00916932	0.0103708	0.177634	0.0542	0.0542
EX_pyr_e	0.00736579	0.00868707	0.23803	0.0595	0.0595
EX_lac__L_e	0.00640332	0.0072658	0.182301	0.0472	0.0472
EX_etoh_e	0.00608881	0.00606872	-0.00476893	0.0165	0.0165
EX_no2_e	0.0547076	0.0425583	-0.362299	0.1024	0.1024
EX_no_e	0.0460492	0.0378855	-0.281531	0.0764	0.0764
EX_n2o_e	0.0197676	0.0154581	-0.354773	0.102	0.102

## Sheet: Supp. Table S10
Summary of flux sampling results using Isopropanol as substrate
rxn_id	median_flux_ch4	median_flux	log2FC	moods-value	KS-value
GK1	0.000571525	0.000652443	0.191036	0.2963	0.2963
G1PACT	0.00063826	0.00060256	-0.0830385	0.0464	0.0464
NTRIR2x	-0.00595835	-0.0122385	1.03844	0.2691	0.2691
3OAS60	0.00953071	0.0108801	0.191036	0.2963	0.2963
ORPT	0.00110859	0.00126547	0.190945	0.2955	0.2955
ADSL2r	0.0011513	0.00131431	0.191036	0.2963	0.2963
OMPDC	0.00110859	0.00126547	0.190945	0.2955	0.2955
KDOPS	4.379e-05	4.99899e-05	0.191036	0.2963	0.2963
SUCOAS	-0.0224333	-0.0542773	1.27471	0.3482	0.3482
MDH	0.166163	0.264555	0.670966	0.4177	0.4177
SBP	0.469611	0.168112	-1.48205	0.5908	0.5908
ATPS4rpp	-7.82013	-9.50469	0.281446	0.9562	0.9562
H4THDPS	0.00411626	0.00469905	0.191036	0.2963	0.2963
FBA3	-0.469611	-0.168112	-1.48205	0.5908	0.5908
PPCK	0.125609	0.150031	0.256319	0.098	0.098
PGAMT	0.00063826	0.00060256	-0.0830385	0.0464	0.0464
DCTPD2	0.123759	0.108834	-0.185403	0.0723	0.0723
GARFT	0.0011524	0.00131556	0.191036	0.2963	0.2963
PT4ACAMDASE	0.00135858	0.00155094	0.191036	0.2963	0.2963
H4THDPRx	0.00204676	0.00233731	0.191511	0.0769	0.0769
H4THDPR	0.00184203	0.00221626	0.266833	0.0974	0.0974
THD2pp	-0.37798	-0.347438	-0.121555	0.0477	0.0477
PUNP5	0.0222096	0.0190767	-0.219371	0.0629	0.0629
ASPTRS	0.00130275	0.0014872	0.191036	0.2963	0.2963
GLYCL	0.0186602	0.728438	5.28677	0.9974	0.9974
KAS15	0.00953071	0.0108801	0.191036	0.2963	0.2963
PHETA1	-0.00366851	-0.0041879	0.191036	0.2963	0.2963
NTP3	0.152172	0.131941	-0.205807	0.0769	0.0769
UAPGR	0.000580217	0.000662366	0.191036	0.2963	0.2963
HCYSMT	0.0569564	0.0488335	-0.221986	0.0923	0.0923
ICL	0.03535	0.063695	0.849469	0.2761	0.2761
SPP	0.000284635	0.000324934	0.191036	0.2963	0.2963
SPS	0.000284635	0.000324934	0.191036	0.2963	0.2963
IPMD	0.00339372	0.00387422	0.191036	0.2963	0.2963
G1SAT	3.87979e-05	4.42911e-05	0.191036	0.2963	0.2963
GALUi	0.000284635	0.000324934	0.191036	0.2963	0.2963
RBPC	1.01882	0.0553405	-4.20242	0.9954	0.9954
PPM	0.116465	0.100928	-0.206576	0.0957	0.0957
EAR60x	0.00471979	0.00496953	0.0743864	0.0499	0.0499
DAPAT_h	-0.00411626	-0.00469905	0.191036	0.2963	0.2963
UAGAAT	4.379e-05	4.99899e-05	0.191036	0.2963	0.2963
MEPCT	0.00587399	0.00670565	0.191036	0.2963	0.2963
SHKK	0.00446752	0.00510005	0.191036	0.2963	0.2963
DDPA	0.00446752	0.00510005	0.191036	0.2963	0.2963
EAR120x	0.00953071	0.0108801	0.191036	0.2963	0.2963
FACOAL120t2pp	0.0435264	0.0387715	-0.166896	0.0543	0.0543
DHORTS	0.00110859	0.00126547	0.190945	0.2955	0.2955
PRAIS	0.0011524	0.00131556	0.191036	0.2963	0.2963
GAPDy	1.94726	0.473779	-2.03916	0.9928	0.9928
3HAD100	0.00953071	0.0108801	0.191036	0.2963	0.2963
3OAR80	0.00953071	0.0108801	0.191036	0.2963	0.2963
GLUDxi	0.86713	0.570337	-0.604432	0.2605	0.2605
MCOATA	0.0696475	0.0795085	0.191036	0.2963	0.2963
DURIPP	0.0704743	0.0505015	-0.48077	0.2023	0.2023
RNDR3	0.00275834	0.00197392	-0.482736	0.1338	0.1338
GLYCLTDy	0.012877	0.0144703	0.168301	0.047	0.047
3HAD160	0.00814423	0.00929732	0.191036	0.2963	0.2963
3OAR160	0.00814423	0.00929732	0.191036	0.2963	0.2963
CHORM	0.00366851	0.0041879	0.191036	0.2963	0.2963
3HAD140	0.00944313	0.0107801	0.191036	0.2963	0.2963
NDPK1	0.108717	0.0939343	-0.210856	0.0634	0.0634
ACGAM6PS	0.000517787	0.000734627	0.504651	0.1995	0.1995
ACGAMPM	0.000517787	0.000734627	0.504651	0.1995	0.1995
DMPPS1	0.00238883	0.00293236	0.295756	0.1265	0.1265
3HAD120_1	0.00953071	0.0108801	0.191036	0.2963	0.2963
TRDR	0.0329983	0.0248872	-0.40699	0.1343	0.1343
ASPTA	-0.0472464	-0.0473539	0.00327958	0.0352	0.0352
SADT	0.00136669	0.00156019	0.191036	0.2963	0.2963
TRPS1	0.00078822	0.000899818	0.191036	0.2963	0.2963
3OAR120	0.00953071	0.0108801	0.191036	0.2963	0.2963
IPPMIa	-0.00339372	-0.00387422	0.191036	0.2963	0.2963
LDH_L	-0.00640332	-0.00817037	0.351582	0.0877	0.0877
3OAR100	0.00953071	0.0108801	0.191036	0.2963	0.2963
PRATPP	0.00100717	0.00114977	0.191036	0.2963	0.2963
3HAD80	0.00953071	0.0108801	0.191036	0.2963	0.2963
GLUTRR	3.87979e-05	4.42911e-05	0.191036	0.2963	0.2963
DMPPS	0.0032248	0.00352332	0.127724	0.078	0.078
3OAS160	0.00814423	0.00929732	0.191036	0.2963	0.2963
ARGSL	0.00798782	0.00919602	0.203207	0.062	0.062
PFK	0.101988	0.0814966	-0.323583	0.0828	0.0828
NDPK3	0.00559474	0.00763352	0.448278	0.3073	0.3073
HISTP	0.00100717	0.00114977	0.191036	0.2963	0.2963
TKT1	0.413392	0.116909	-1.82212	0.9835	0.9835
AKGDH	0.0185833	0.0523272	1.49356	0.3604	0.3604
ACCOAC	0.0696475	0.0795085	0.191036	0.2963	0.2963
ANPRT	0.00078822	0.000899818	0.191036	0.2963	0.2963
3HAD60	0.00953071	0.0108801	0.191036	0.2963	0.2963
H2CO3D	-0.41307	-0.386554	-0.0957147	0.0665	0.0665
TKT2	-0.418054	-0.122014	-1.77665	0.983	0.983
NDPK2	0.0730437	0.0535216	-0.448639	0.1988	0.1988
ARGSS	0.00798782	0.00919602	0.203207	0.062	0.062
HXPRT	0.0222108	0.0190782	-0.219339	0.0629	0.0629
MTHFC	2.76497	1.51868	-0.864449	0.997	0.997
ALDD2x	0.0594064	0.0396033	-0.584998	0.1596	0.1596
ASPK	0.00751348	0.00857727	0.191036	0.2963	0.2963
3OAR140	0.00953071	0.0108801	0.191036	0.2963	0.2963
ALAD_L	-0.00560402	-0.00639746	0.191036	0.2963	0.2963
PPA	0.718158	0.591537	-0.279833	0.2463	0.2463
UGMDDS	0.000580217	0.000662366	0.191036	0.2963	0.2963
FDH	3.40564	1.41957	-1.26248	0.9987	0.9987
PYK3	0.0502589	0.0444685	-0.176594	0.0519	0.0519
IGPS	0.00078822	0.000899818	0.191036	0.2963	0.2963
PGCD	0.128998	0.850936	2.7217	0.9954	0.9954
GMPS2	0.000571525	0.000652443	0.191036	0.2963	0.2963
L3EHAA	0.0201087	0.0426372	1.08429	0.3012	0.3012
L3EHAAL	0.0201087	0.0426372	1.08429	0.3012	0.3012
PRAI	0.00078822	0.000899818	0.191036	0.2963	0.2963
ACOTA	-0.00798782	-0.00919602	0.203207	0.062	0.062
THRS	0.0023975	0.00273695	0.191036	0.2963	0.2963
SSALx	0.0254196	0.0431842	0.764561	0.2696	0.2696
MTHFD_1	2.76497	1.51868	-0.864449	0.997	0.997
G3PAT160	0.00132257	0.00150982	0.191036	0.2963	0.2963
CBPS	0.0452839	0.0432545	-0.0661491	0.0287	0.0287
CS	0.117909	0.216289	0.875286	0.5277	0.5277
Kabcpp	0.00192676	0.00219956	0.191036	0.2963	0.2963
DPLPTAT1	8.758e-05	9.99798e-05	0.191036	0.2963	0.2963
PGM	0.0205572	1.16498	5.82452	1	1
MTHFR3	-0.00101402	-0.00115759	0.191036	0.2963	0.2963
SHK3Dr	0.00446752	0.00510005	0.191036	0.2963	0.2963
SERDA	0.0587501	0.0445008	-0.400758	0.103	0.103
GF6PTA	0.00120422	0.00137472	0.191036	0.2963	0.2963
PGCM	-0.00156549	-0.00178714	0.191036	0.2963	0.2963
ASPCT	0.00110859	0.00126547	0.190945	0.2955	0.2955
NADH16pp	4.12944	4.6279	0.164411	0.6529	0.6529
AIRC3	0.0931403	0.0831665	-0.163404	0.058	0.058
IMPC	0.00215847	0.00246408	0.191036	0.2963	0.2963
PGK	1.94726	0.473779	-2.03916	0.9928	0.9928
ACLS	0.00610126	0.00696509	0.191036	0.2963	0.2963
TALA	0.0589254	0.0558145	-0.0782492	0.214	0.214
IMPD	0.000571525	0.000652443	0.191036	0.2963	0.2963
DHQS	0.00446752	0.00510005	0.191036	0.2963	0.2963
AIRCr	0.0918706	0.0818877	-0.165956	0.0583	0.0583
DHQTi	0.00446752	0.00510005	0.191036	0.2963	0.2963
AIRC2	0.0931403	0.0831665	-0.163404	0.058	0.058
3OAS120	0.00953071	0.0108801	0.191036	0.2963	0.2963
3HAD40_2	0.00953071	0.0108801	0.191036	0.2963	0.2963
DHFR	3.02808e-05	3.4568e-05	0.191036	0.2963	0.2963
HISTD	0.00100717	0.00114977	0.191036	0.2963	0.2963
PRAMPC	0.00100717	0.00114977	0.191036	0.2963	0.2963
ACYP_2	0.0504622	0.0444734	-0.182261	0.0541	0.0541
FALTHFL	2.68944	9.75027e-07	-21.3954	1	1
DXPS	0.00587752	0.00670968	0.191036	0.2963	0.2963
APSR	0.00136669	0.00156019	0.191036	0.2963	0.2963
FBA	-0.406678	-0.186798	-1.12241	0.4949	0.4949
CYTK1	0.00881246	0.0100612	0.19119	0.2962	0.2962
AICART	0.00215847	0.00246408	0.191036	0.2963	0.2963
EAR180y	0.00220215	0.00263403	0.258358	0.1276	0.1276
RBCh	0.0128687	0.014462	0.168403	0.047	0.047
UM3PL	0.000580217	0.000662366	0.191036	0.2963	0.2963
EAR140x_1	0.00944313	0.0107801	0.191036	0.2963	0.2963
UAGCVT	0.000580217	0.000662366	0.191036	0.2963	0.2963
NH4tpp_1	0.0648029	0.0691407	0.0934776	0.1206	0.1206
RNTR3	0.0284826	0.0207046	-0.460128	0.127	0.127
ADSS	0.0237874	0.0208645	-0.189148	0.0588	0.0588
HSK	0.0023975	0.00273695	0.191036	0.2963	0.2963
KARA1	0.00610126	0.00696509	0.191036	0.2963	0.2963
EAR60y	0.00442727	0.00558161	0.334263	0.162	0.162
ADK1	0.846187	1.83646	1.11788	0.9536	0.9536
DXPRIi	0.00587399	0.00670565	0.191036	0.2963	0.2963
EAR80y	0.00540285	0.00488243	-0.146121	0.1152	0.1152
CDPMEK	0.00587399	0.00670565	0.191036	0.2963	0.2963
HMBDPO	0.00587399	0.00670565	0.191036	0.2963	0.2963
GLUPRT	0.0011524	0.00131556	0.191036	0.2963	0.2963
TPI	0.890666	0.369782	-1.26821	0.972	0.972
PSP_L	0.128998	0.850936	2.7217	0.9954	0.9954
EAR40y	0.00490179	0.00576481	0.233965	0.1205	0.1205
UMPK	0.0722081	0.052478	-0.460448	0.2006	0.2006
3OAS100	0.00953071	0.0108801	0.191036	0.2963	0.2963
CYNL	0.0322823	0.0275892	-0.22664	0.0541	0.0541
SQLS	0.000215563	0.000205865	-0.0664126	0.0224	0.0224
SQLSx	0.000227322	0.000229193	0.0118242	0.0301	0.0301
PSERT	-0.128998	-0.850936	2.7217	0.9954	0.9954
G6PDH2r	0.0357605	0.104423	1.546	0.3983	0.3983
PPS	0.195162	1.29326	2.72826	0.9973	0.9973
IPPS	0.00339372	0.00387422	0.191036	0.2963	0.2963
3OAR40	0.00953071	0.0108801	0.191036	0.2963	0.2963
NDPK7	0.00275834	0.00197392	-0.482736	0.1338	0.1338
MOBDabc	3.45722e-05	3.9467e-05	0.191036	0.2963	0.2963
MG2uabcpp	0.000766325	0.000874823	0.191036	0.2963	0.2963
3OAR60	0.00953071	0.0108801	0.191036	0.2963	0.2963
GLNS	0.251708	0.222979	-0.174841	0.0882	0.0882
SO4t2pp	0.00136669	0.00156019	0.191036	0.2963	0.2963
CYSS	0.00136669	0.00156019	0.191036	0.2963	0.2963
FACOAE120	0.0435264	0.0387715	-0.166896	0.0543	0.0543
atpm	3.60551	3.58214	-0.00938219	0.0954	0.0954
ADA	0.0222096	0.0190767	-0.219371	0.0629	0.0629
RNTRA3	0.026678	0.0188231	-0.503142	0.1291	0.1291
METAT	0.0570596	0.0489627	-0.220788	0.0922	0.0922
CTPS1	0.129954	0.101992	-0.34954	0.1121	0.1121
PRFGS	0.0011524	0.00131556	0.191036	0.2963	0.2963
UAAGMDAt2	0.000580217	0.000662366	0.191036	0.2963	0.2963
SQLC	8.758e-05	9.99798e-05	0.191036	0.2963	0.2963
CTPS2	0.0570923	0.048534	-0.234301	0.0664	0.0664
GLUTRS	3.87979e-05	4.42911e-05	0.191036	0.2963	0.2963
ANS	0.00078822	0.000899818	0.191036	0.2963	0.2963
ADPT	0.0247831	0.0203519	-0.284192	0.0699	0.0699
AHCi	0.056969	0.0488501	-0.221816	0.0923	0.0923
ASNTRH	0.00130275	0.0014872	0.191036	0.2963	0.2963
UAMAGS	0.000580217	0.000662366	0.191036	0.2963	0.2963
PEPC	0.0983189	0.0897044	-0.13229	0.0437	0.0437
TTHS	0.000448847	0.000512397	0.191036	0.2963	0.2963
AHTS	8.758e-05	9.99798e-05	0.191036	0.2963	0.2963
FHS	8.758e-05	9.99798e-05	0.191036	0.2963	0.2963
EAR180x	0.00193642	0.00215599	0.154958	0.0977	0.0977
AGPR	0.00798782	0.00919602	0.203207	0.062	0.062
RHS	8.758e-05	9.99798e-05	0.191036	0.2963	0.2963
GHMT2r	0.0509397	0.789894	3.9548	0.9974	0.9974
PRPPS	0.202417	0.166163	-0.284725	0.1775	0.1775
PKETX	0.177522	0.312379	0.815301	0.5403	0.5403
EAR40x	0.00415392	0.0047488	0.193091	0.0813	0.0813
3HAD180	0.00431572	0.00492676	0.191036	0.2963	0.2963
DRPA	0.0704743	0.0505015	-0.48077	0.2023	0.2023
ORNTAC	0.00798782	0.00919602	0.203207	0.062	0.062
PUNP1	0.0246835	0.0202376	-0.286511	0.0698	0.0698
G5SADs	-0.00388636	-0.0044366	0.191036	0.2963	0.2963
PRASCSi	0.0011513	0.00131431	0.191036	0.2963	0.2963
ACONT	0.117897	0.216274	0.875331	0.5277	0.5277
CAT	0.00315815	0.00363851	0.20427	0.051	0.051
AFC	4.379e-05	4.99899e-05	0.191036	0.2963	0.2963
KDOCT2	4.379e-05	4.99899e-05	0.191036	0.2963	0.2963
3OAS180	0.00431572	0.00492676	0.191036	0.2963	0.2963
DHORD2	0.000534899	0.000688943	0.365118	0.1528	0.1528
NADPHQR3	0.186828	0.114937	-0.700873	0.1857	0.1857
ACGK	0.00798782	0.00919602	0.203207	0.062	0.062
SUCDHm8	-0.0901599	-0.184298	1.03149	0.5064	0.5064
UAGDP	0.00120422	0.00137472	0.191036	0.2963	0.2963
ALCD2x	-0.00608881	-0.0068651	0.17312	0.0489	0.0489
PGL	0.0357605	0.104423	1.546	0.3983	0.3983
EAR100x	0.00953071	0.0108801	0.191036	0.2963	0.2963
3OAR180	0.00431572	0.00492676	0.191036	0.2963	0.2963
A5PISO	4.379e-05	4.99899e-05	0.191036	0.2963	0.2963
ATPPRT	-0.00100717	-0.00114977	0.191036	0.2963	0.2963
UAMAS	0.000580217	0.000662366	0.191036	0.2963	0.2963
PRAGSr	0.0011524	0.00131556	0.191036	0.2963	0.2963
DAPDC	0.00353604	0.00403669	0.191036	0.2963	0.2963
IPDDI	-0.000499508	-0.000736004	0.559206	0.0712	0.0712
DHAD1	0.00610126	0.00696509	0.191036	0.2963	0.2963
KDOPP	4.379e-05	4.99899e-05	0.191036	0.2963	0.2963
OCBT	0.00798782	0.00919602	0.203207	0.062	0.062
EAR160x	0.00814423	0.00929732	0.191036	0.2963	0.2963
3OAS80	0.00953071	0.0108801	0.191036	0.2963	0.2963
UAGPT3	0.000580217	0.000662366	0.191036	0.2963	0.2963
UPPRT	0.129114	0.102778	-0.329114	0.1575	0.1575
DHAD2	0.00202529	0.00231203	0.191036	0.2963	0.2963
GLU5K	0.10297	0.090213	-0.19081	0.059	0.059
PPNDH	0.00366851	0.0041879	0.191036	0.2963	0.2963
PRMICI	0.00100717	0.00114977	0.191036	0.2963	0.2963
GLUDC	0.0150907	0.0314019	1.05719	0.2712	0.2712
ERTHMMOR	0.00202529	0.00231203	0.191036	0.2963	0.2963
MALS	0.0277724	0.0292577	0.075169	0.0584	0.0584
G3PD1	0.0017365	0.00248153	0.515043	0.1795	0.1795
G3PD2	0.00220338	0.0020976	-0.0709754	0.0327	0.0327
HSTPT	-0.00100717	-0.00114977	0.191036	0.2963	0.2963
MCITD	0.00202529	0.00231203	0.191036	0.2963	0.2963
PGI	-0.0373302	-0.106373	1.51072	0.3992	0.3992
KARA2x	0.00100944	0.00116008	0.200672	0.1213	0.1213
ENO	-0.0206076	-1.16507	5.8211	1	1
UDCPP	0.000580217	0.000662366	0.191036	0.2963	0.2963
FE2Gabcpp	6.944e-05	7.92715e-05	0.191036	0.2963	0.2963
EAR80x	0.00370198	0.00557868	0.591627	0.2366	0.2366
ILETA	0.00202529	0.00231203	0.191036	0.2963	0.2963
ALAR	0.00116043	0.00132473	0.191036	0.2963	0.2963
DHORD5	0.000523296	0.00052295	-0.000954294	0.0688	0.0688
KARI_23dhmb	0.000941633	0.00107188	0.186904	0.1091	0.1091
ADSL1r	0.0237874	0.0208645	-0.189148	0.0588	0.0588
SULR	0.00136669	0.00156019	0.191036	0.2963	0.2963
LEUTAi	-0.00339372	-0.00387422	0.191036	0.2963	0.2963
ACS	0.247037	0.198478	-0.315748	0.1421	0.1421
UHGADA	4.379e-05	4.99899e-05	0.191036	0.2963	0.2963
MHPGLUT	0.00063684	0.000581772	-0.130477	0.0936	0.0936
ARGDC	0.00631341	0.00727393	0.204317	0.051	0.051
VALTA	-0.00270403	-0.00308688	0.191036	0.2963	0.2963
ASNS1	0.00130275	0.0014872	0.191036	0.2963	0.2963
U23GAAT	4.379e-05	4.99899e-05	0.191036	0.2963	0.2963
GND	0.0357592	0.104421	1.54602	0.3983	0.3983
PHEH	0.00135858	0.00155094	0.191036	0.2963	0.2963
PAPPT4	0.000580217	0.000662366	0.191036	0.2963	0.2963
G5SD	0.10297	0.090213	-0.19081	0.059	0.059
D78FOR	0.00135858	0.00155094	0.191036	0.2963	0.2963
GLUDy	0.970025	1.41007	0.53967	0.4011	0.4011
GLUSy	0.0974278	0.0844994	-0.205393	0.0533	0.0533
RPI	0.334078	0.0568118	-2.55592	0.9421	0.9421
3OAS140	0.00953071	0.0108801	0.191036	0.2963	0.2963
SS	-0.000153028	-0.000229372	0.583891	0.1662	0.1662
SSx	0.000180595	0.000230162	0.349892	0.0964	0.0964
FBP	0.545535	0.29747	-0.87493	0.4342	0.4342
IG3PS_2	0.000651365	0.00114977	0.819805	0.7415	0.7415
FUM	-0.1348	-0.228035	0.758436	0.4589	0.4589
PSPPS	0.000408392	0.000545765	0.418328	0.1954	0.1954
HSDH	0.00175686	0.00186171	0.0836278	0.0615	0.0615
HSDy	0.0014847	0.00192069	0.371452	0.1377	0.1377
ICHDx	0.074399	0.1377	0.888172	0.4718	0.4718
SERAT	0.00136669	0.00156019	0.191036	0.2963	0.2963
APDH	0.0587501	0.0445008	-0.400758	0.103	0.103
ASAD	-0.00751348	-0.00857727	0.191036	0.2963	0.2963
PYNP2r	0.0456335	0.0409859	-0.154963	0.0551	0.0551
PRUK	1.03704	0.0774572	-3.74293	0.9953	0.9953
ALAALAr	0.000580217	0.000662366	0.191036	0.2963	0.2963
PSCVT	0.00446752	0.00510005	0.191036	0.2963	0.2963
IGPDH	0.00100717	0.00114977	0.191036	0.2963	0.2963
ACHBS	0.00202529	0.00231203	0.191036	0.2963	0.2963
DCYTD	0.0704743	0.0505015	-0.48077	0.2023	0.2023
P5CRx	0.00178667	0.00210775	0.238431	0.1257	0.1257
P5CR	0.00190829	0.00218546	0.195657	0.0905	0.0905
FA160ACPHi	0.00148339	0.00169341	0.191036	0.2963	0.2963
MECDPS	0.00587399	0.00670565	0.191036	0.2963	0.2963
PYK	0.0920075	0.0834875	-0.140191	0.0369	0.0369
CITMS	0.00202529	0.00231203	0.191036	0.2963	0.2963
CYTCBB3pp1	2.51636	2.97991	0.243933	0.9417	0.9417
DAPE	0.00411626	0.00469905	0.191036	0.2963	0.2963
CHORS	0.00446752	0.00510005	0.191036	0.2963	0.2963
ACKr	-0.100067	-0.0853676	-0.229209	0.0642	0.0642
CITCIb	0.00202529	0.00231203	0.191036	0.2963	0.2963
PIuabcpp	0.012711	0.0145106	0.191036	0.2963	0.2963
NTPP3	0.0704743	0.0505015	-0.48077	0.2023	0.2023
PUTA3	0.099072	0.0857708	-0.207991	0.0606	0.0606
DMATT	0.00195216	0.00222855	0.191036	0.2963	0.2963
GRTT	0.00195216	0.00222855	0.191036	0.2963	0.2963
MEOHDHpp	3.44653	1.24975e-06	-21.3951	1	1
GLUR	0.000580217	0.000662366	0.191036	0.2963	0.2963
FA180ACPH	0.00167059	0.00190712	0.191036	0.2963	0.2963
FA140ACPHi	0.00050249	0.000573634	0.191036	0.2963	0.2963
OOR3r	0.00387707	0.00240913	-0.686452	0.2212	0.2212
POR_syn	0.00734504	0.0105791	0.526378	0.3813	0.3813
NTD3pp	0.0704743	0.0505015	-0.48077	0.2023	0.2023
PSD180	0.000428047	0.000488651	0.191036	0.2963	0.2963
PSD160	0.000379878	0.000433662	0.191036	0.2963	0.2963
PSD140	0.00012918	0.00014747	0.191036	0.2963	0.2963
PSSA180	0.000438009	0.000500024	0.191036	0.2963	0.2963
PSSA160	0.000388724	0.00044376	0.191036	0.2963	0.2963
PSSA140	0.00013218	0.000150895	0.191036	0.2963	0.2963
DASYN180	0.00132257	0.00150982	0.191036	0.2963	0.2963
DASYN160	0.00117256	0.00133858	0.191036	0.2963	0.2963
DASYN140	0.000398204	0.000454583	0.191036	0.2963	0.2963
AGPAT180	0.00132257	0.00150982	0.191036	0.2963	0.2963
AGPAT160	0.00117256	0.00133858	0.191036	0.2963	0.2963
AGPAT140	0.000398204	0.000454583	0.191036	0.2963	0.2963
G3PAT180	0.00117256	0.00133858	0.191036	0.2963	0.2963
G3PAT140	0.000398204	0.000454583	0.191036	0.2963	0.2963
PGPP180	0.000588975	0.000672364	0.191036	0.2963	0.2963
PGPP160	0.000522195	0.00059613	0.191036	0.2963	0.2963
PGSA180	0.000588975	0.000672364	0.191036	0.2963	0.2963
PGSA160	0.000522195	0.00059613	0.191036	0.2963	0.2963
CDLPNS140cmp	8.86747e-05	0.00010123	0.191036	0.2963	0.2963
FTHFD	0.0995741	0.0772176	-0.366841	0.1105	0.1105
PPTGS_MF	0.000580217	0.000662366	0.191036	0.2963	0.2963
PGPP140	0.000177349	0.000202459	0.191036	0.2963	0.2963
PGSA140	0.000177349	0.000202459	0.191036	0.2963	0.2963
CDLPNS180cmp	0.000295582	0.000337432	0.191036	0.2963	0.2963
CDLPNS160cmp	0.000261645	0.00029869	0.191036	0.2963	0.2963
CYO1_KT	0.817429	3.65482	2.16064	0.9984	0.9984
FE2tex	6.944e-05	7.92715e-05	0.191036	0.2963	0.2963
Ktex	0.00192676	0.00219956	0.191036	0.2963	0.2963
NH4tex	0.254872	0.239476	-0.0898918	0.0768	0.0768
MG2tex	0.000766325	0.000874823	0.191036	0.2963	0.2963
NAtex	0.000426952	0.000487402	0.191036	0.2963	0.2963
PItex	0.012711	0.0145106	0.191036	0.2963	0.2963
SO4tex	0.00136669	0.00156019	0.191036	0.2963	0.2963
MOBDtex	3.45722e-05	3.9467e-05	0.191036	0.2963	0.2963
CO2tex	-2.69712	-2.60664	-0.0492272	0.2942	0.2942
CO2tpp	-2.69712	-2.60664	-0.0492272	0.2942	0.2942
H2Otex	-6.26795	-3.90784	-0.68162	0.9995	0.9995
H2Otpp	-3.44277	-2.63292	-0.386905	0.987	0.987
O2tex	6.18726	4.33788	-0.512312	0.999	0.999
O2tpp	2.54154	3.00682	0.242535	0.9392	0.9392
CU2t5pp	0.000109475	0.000124975	0.191036	0.2963	0.2963
CU2tex	0.000109475	0.000124975	0.191036	0.2963	0.2963
CA2tex	0.000109475	0.000124975	0.191036	0.2963	0.2963
CLtex	0.00234276	0.00267446	0.191036	0.2963	0.2963
AGDI_1	0.00631341	0.00727393	0.204317	0.051	0.051
CMPA_1	0.00631341	0.00727393	0.204317	0.051	0.051
ABTA	0.0254196	0.0431842	0.764561	0.2696	0.2696
GGPTRCS	0.00631341	0.00727393	0.204317	0.051	0.051
GGPTRCO	0.00631341	0.00727393	0.204317	0.051	0.051
GGGABADr	0.00631341	0.00727393	0.204317	0.051	0.051
GGGABAH	0.00631341	0.00727393	0.204317	0.051	0.051
GLGC	0.00128086	0.0014622	0.191036	0.2963	0.2963
GLCS1	0.00128086	0.0014622	0.191036	0.2963	0.2963
FALDtpp	2.68944	9.75027e-07	-21.3954	1	1
ATPS1	0.443048	0.403842	-0.13367	0.0849	0.0849
PGLYCP	0.0128687	0.014462	0.168403	0.047	0.047
NAtpp	0.000426952	0.000487402	0.191036	0.2963	0.2963
CA2abcpp	0.000109475	0.000124975	0.191036	0.2963	0.2963
CLtipp	0.00234276	0.00267446	0.191036	0.2963	0.2963
NTD2	0.0456335	0.0409859	-0.154963	0.0551	0.0551
PPM2	0.0704743	0.0505015	-0.48077	0.2023	0.2023
FORtex	-0.0622961	-0.0449837	-0.46974	0.1264	0.1264
SUCCt1pp	-0.00683346	-0.00716826	0.0690054	0.022	0.022
SUCCtex	-0.00683346	-0.00716826	0.0690054	0.022	0.022
AKGtex	-0.0035595	-0.00479843	0.430886	0.1088	0.1088
AKGt2rpp	-0.0035595	-0.00479843	0.430886	0.1088	0.1088
ACt2rpp	-0.00916932	-0.0120001	0.388154	0.1136	0.1136
ACtex	-0.00916932	-0.0120001	0.388154	0.1136	0.1136
PYRt2rpp	-0.00736579	-0.00956366	0.376724	0.0948	0.0948
PYRtex	-0.00736579	-0.00956366	0.376724	0.0948	0.0948
L_LACtex	-0.00640332	-0.00817037	0.351582	0.0877	0.0877
L_LACt2rpp	-0.00640332	-0.00817037	0.351582	0.0877	0.0877
ETOHtex	-0.00608881	-0.0068651	0.17312	0.0489	0.0489
ETOHtrpp	-0.00608881	-0.0068651	0.17312	0.0489	0.0489
HSST	0.000999725	0.00114127	0.191036	0.2963	0.2963
SHSL1	0.000999725	0.00114127	0.191036	0.2963	0.2963
CYSTL	0.000999725	0.00114127	0.191036	0.2963	0.2963
METS	0.00032672	0.000533671	0.707897	0.2189	0.2189
FTHFLi	-2.63924	-1.41262	-0.901749	0.9939	0.9939
FALDHpp	0.743218	2.35086e-07	-21.5922	1	1
CBMD	0.0322823	0.0275892	-0.22664	0.0541	0.0541
CBPD	0.0322823	0.0275892	-0.22664	0.0541	0.0541
AMOq8	0.189188	0.172352	-0.134467	0.0841	0.0841
HAO1pp	0.189188	0.172352	-0.134467	0.0841	0.0841
NITR_NOpp	-0.0637431	-0.0633824	-0.00818704	0.0444	0.0444
NORpp	0.0197676	0.0163164	-0.276819	0.0713	0.0713
NO2tpp	0.00595835	0.0122385	1.03844	0.2691	0.2691
NO2tex	-0.0547076	-0.0456587	-0.260849	0.0799	0.0799
N2Otex	-0.0197676	-0.0163164	-0.276819	0.0713	0.0713
NOtex	-0.0460492	-0.0420483	-0.131129	0.0377	0.0377
BIOMASS_Mfumariolicum_Pic	0.0118952	0.0135794	0.191036	0.2963	0.2963
DM_biomass	0.0118952	0.0135794	0.191036	0.2963	0.2963
DM_cyt554red_p	0.567564	0.517055	-0.134467	0.0841	0.0841
SK_cyt554oxi_p	-0.567564	-0.517055	-0.134467	0.0841	0.0841
EX_o2_e	-6.18726	-4.33788	-0.512312	0.999	0.999
EX_nh4_e	-0.254872	-0.239476	-0.0898918	0.0768	0.0768
EX_h2o_e	6.26795	3.90784	-0.68162	0.9995	0.9995
EX_h_e	0.886095	0.807684	-0.13367	0.0849	0.0849
EX_pi_e	-0.012711	-0.0145106	0.191036	0.2963	0.2963
EX_so4_e	-0.00136669	-0.00156019	0.191036	0.2963	0.2963
EX_fe2_e	-6.944e-05	-7.92715e-05	0.191036	0.2963	0.2963
EX_mg2_e	-0.000766325	-0.000874823	0.191036	0.2963	0.2963
EX_k_e	-0.00192676	-0.00219956	0.191036	0.2963	0.2963
EX_na1_e	-0.000426952	-0.000487402	0.191036	0.2963	0.2963
EX_mobd_e	-3.45722e-05	-3.9467e-05	0.191036	0.2963	0.2963
EX_cu2_e	-0.000109475	-0.000124975	0.191036	0.2963	0.2963
EX_ca2_e	-0.000109475	-0.000124975	0.191036	0.2963	0.2963
EX_cl_e	-0.00234276	-0.00267446	0.191036	0.2963	0.2963
EX_co2_e	2.69712	2.60664	-0.0492272	0.2942	0.2942
EX_for_e	0.0622961	0.0449837	-0.46974	0.1264	0.1264
EX_succ_e	0.00683346	0.00716826	0.0690054	0.022	0.022
EX_akg_e	0.0035595	0.00479843	0.430886	0.1088	0.1088
EX_ac_e	0.00916932	0.0120001	0.388154	0.1136	0.1136
EX_pyr_e	0.00736579	0.00956366	0.376724	0.0948	0.0948
EX_lac__L_e	0.00640332	0.00817037	0.351582	0.0877	0.0877
EX_etoh_e	0.00608881	0.0068651	0.17312	0.0489	0.0489
EX_no2_e	0.0547076	0.0456587	-0.260849	0.0799	0.0799
EX_no_e	0.0460492	0.0420483	-0.131129	0.0377	0.0377
EX_n2o_e	0.0197676	0.0163164	-0.276819	0.0713	0.0713

## Sheet: Supp. Table S11
Summary of flux sampling results using Acetone as substrate
rxn_id	median_flux_ch4	median_flux	log2FC	moods-value	KS-value
GK1	0.000571525	0.000529006	-0.111533	0.1671	0.1671
G1PACT	0.00063826	0.000574423	-0.152031	0.0623	0.0623
NTRIR2x	-0.00595835	-0.00748996	0.330045	0.088	0.088
3OAS60	0.00953071	0.00882167	-0.111533	0.1671	0.1671
ORPT	0.00110859	0.00102586	-0.111888	0.1673	0.1673
ADSL2r	0.0011513	0.00106565	-0.111533	0.1671	0.1671
OMPDC	0.00110859	0.00102586	-0.111888	0.1673	0.1673
KDOPS	4.379e-05	4.05322e-05	-0.111533	0.1671	0.1671
SUCOAS	-0.0224333	-0.046919	1.06453	0.2989	0.2989
MDH	0.166163	0.239036	0.524627	0.3368	0.3368
SBP	0.469611	0.143502	-1.7104	0.6436	0.6436
ATPS4rpp	-7.82013	-8.94376	0.193689	0.8376	0.8376
H4THDPS	0.00411626	0.00381002	-0.111533	0.1671	0.1671
FBA3	-0.469611	-0.143502	-1.7104	0.6436	0.6436
PPCK	0.125609	0.130707	0.0573962	0.0422	0.0422
PGAMT	0.00063826	0.000574423	-0.152031	0.0623	0.0623
DCTPD2	0.123759	0.0946675	-0.386595	0.1286	0.1286
GARFT	0.0011524	0.00106667	-0.111533	0.1671	0.1671
PT4ACAMDASE	0.00135858	0.00125751	-0.111533	0.1671	0.1671
H4THDPRx	0.00204676	0.00180662	-0.180045	0.0816	0.0816
H4THDPR	0.00184203	0.00183877	-0.00255158	0.0269	0.0269
THD2pp	-0.37798	-0.286455	-0.4	0.1152	0.1152
PUNP5	0.0222096	0.0164425	-0.433758	0.1047	0.1047
ASPTRS	0.00130275	0.00120583	-0.111533	0.1671	0.1671
GLYCL	0.0186602	0.783712	5.39229	0.9968	0.9968
KAS15	0.00953071	0.00882167	-0.111533	0.1671	0.1671
PHETA1	-0.00366851	-0.00339558	-0.111533	0.1671	0.1671
NTP3	0.152172	0.112904	-0.430604	0.1333	0.1333
UAPGR	0.000580217	0.000537051	-0.111533	0.1671	0.1671
HCYSMT	0.0569564	0.0412926	-0.463975	0.175	0.175
ICL	0.03535	0.0573547	0.6982	0.2298	0.2298
SPP	0.000284635	0.000263459	-0.111533	0.1671	0.1671
SPS	0.000284635	0.000263459	-0.111533	0.1671	0.1671
IPMD	0.00339372	0.00314124	-0.111533	0.1671	0.1671
G1SAT	3.87979e-05	3.59115e-05	-0.111533	0.1671	0.1671
GALUi	0.000284635	0.000263459	-0.111533	0.1671	0.1671
RBPC	1.01882	0.0544588	-4.22559	0.9948	0.9948
PPM	0.116465	0.0858337	-0.44028	0.184	0.184
EAR60x	0.00471979	0.00421131	-0.164452	0.0743	0.0743
DAPAT_h	-0.00411626	-0.00381002	-0.111533	0.1671	0.1671
UAGAAT	4.379e-05	4.05322e-05	-0.111533	0.1671	0.1671
MEPCT	0.00587399	0.00543699	-0.111533	0.1671	0.1671
SHKK	0.00446752	0.00413515	-0.111533	0.1671	0.1671
DDPA	0.00446752	0.00413515	-0.111533	0.1671	0.1671
EAR120x	0.00953071	0.00882167	-0.111533	0.1671	0.1671
FACOAL120t2pp	0.0435264	0.036286	-0.262479	0.0718	0.0718
DHORTS	0.00110859	0.00102586	-0.111888	0.1673	0.1673
PRAIS	0.0011524	0.00106667	-0.111533	0.1671	0.1671
GAPDy	1.94726	0.430031	-2.17893	0.9919	0.9919
3HAD100	0.00953071	0.00882167	-0.111533	0.1671	0.1671
3OAR80	0.00953071	0.00882167	-0.111533	0.1671	0.1671
GLUDxi	0.86713	0.653574	-0.407897	0.19	0.19
MCOATA	0.0696475	0.064466	-0.111533	0.1671	0.1671
DURIPP	0.0704743	0.0473355	-0.574172	0.2454	0.2454
RNDR3	0.00275834	0.00111082	-1.31217	0.3517	0.3517
GLYCLTDy	0.012877	0.0134518	0.0630021	0.0222	0.0222
3HAD160	0.00814423	0.00753834	-0.111533	0.1671	0.1671
3OAR160	0.00814423	0.00753834	-0.111533	0.1671	0.1671
CHORM	0.00366851	0.00339558	-0.111533	0.1671	0.1671
3HAD140	0.00944313	0.0087406	-0.111533	0.1671	0.1671
NDPK1	0.108717	0.0814588	-0.416436	0.1176	0.1176
ACGAM6PS	0.000517787	0.000470987	-0.136671	0.0494	0.0494
ACGAMPM	0.000517787	0.000470987	-0.136671	0.0494	0.0494
DMPPS1	0.00238883	0.00248538	0.057159	0.031	0.031
3HAD120_1	0.00953071	0.00882167	-0.111533	0.1671	0.1671
TRDR	0.0329983	0.0222166	-0.570755	0.1784	0.1784
ASPTA	-0.0472464	-0.0412477	-0.19589	0.1098	0.1098
SADT	0.00136669	0.00126501	-0.111533	0.1671	0.1671
TRPS1	0.00078822	0.000729579	-0.111533	0.1671	0.1671
3OAR120	0.00953071	0.00882167	-0.111533	0.1671	0.1671
IPPMIa	-0.00339372	-0.00314124	-0.111533	0.1671	0.1671
LDH_L	-0.00640332	-0.00683013	0.093094	0.0296	0.0296
3OAR100	0.00953071	0.00882167	-0.111533	0.1671	0.1671
PRATPP	0.00100717	0.00093224	-0.111533	0.1671	0.1671
3HAD80	0.00953071	0.00882167	-0.111533	0.1671	0.1671
GLUTRR	3.87979e-05	3.59115e-05	-0.111533	0.1671	0.1671
DMPPS	0.0032248	0.00274156	-0.234212	0.1319	0.1319
3OAS160	0.00814423	0.00753834	-0.111533	0.1671	0.1671
ARGSL	0.00798782	0.00832753	0.0600869	0.021	0.021
PFK	0.101988	0.0724052	-0.494228	0.1214	0.1214
NDPK3	0.00559474	0.00665176	0.249664	0.2359	0.2359
HISTP	0.00100717	0.00093224	-0.111533	0.1671	0.1671
TKT1	0.413392	0.0998805	-2.04923	0.9856	0.9856
AKGDH	0.0185833	0.0455306	1.29283	0.3149	0.3149
ACCOAC	0.0696475	0.064466	-0.111533	0.1671	0.1671
ANPRT	0.00078822	0.000729579	-0.111533	0.1671	0.1671
3HAD60	0.00953071	0.00882167	-0.111533	0.1671	0.1671
H2CO3D	-0.41307	-0.327236	-0.336056	0.1957	0.1957
TKT2	-0.418054	-0.104135	-2.00523	0.9855	0.9855
NDPK2	0.0730437	0.0497857	-0.553028	0.2472	0.2472
ARGSS	0.00798782	0.00832753	0.0600869	0.021	0.021
HXPRT	0.0222108	0.0164434	-0.433752	0.1047	0.1047
MTHFC	2.76497	1.61954	-0.771675	0.9965	0.9965
ALDD2x	0.0594064	0.0374201	-0.666806	0.1851	0.1851
ASPK	0.00751348	0.00695451	-0.111533	0.1671	0.1671
3OAR140	0.00953071	0.00882167	-0.111533	0.1671	0.1671
ALAD_L	-0.00560402	-0.00518711	-0.111533	0.1671	0.1671
PPA	0.718158	0.530407	-0.437201	0.3825	0.3825
UGMDDS	0.000580217	0.000537051	-0.111533	0.1671	0.1671
FDH	3.40564	1.52785	-1.15642	0.999	0.999
PYK3	0.0502589	0.0392697	-0.355962	0.0972	0.0972
IGPS	0.00078822	0.000729579	-0.111533	0.1671	0.1671
PGCD	0.128998	0.891694	2.7892	0.9943	0.9943
GMPS2	0.000571525	0.000529006	-0.111533	0.1671	0.1671
L3EHAA	0.0201087	0.036197	0.848054	0.2433	0.2433
L3EHAAL	0.0201087	0.036197	0.848054	0.2433	0.2433
PRAI	0.00078822	0.000729579	-0.111533	0.1671	0.1671
ACOTA	-0.00798782	-0.00832753	0.0600869	0.021	0.021
THRS	0.0023975	0.00221914	-0.111533	0.1671	0.1671
SSALx	0.0254196	0.0394211	0.633028	0.2247	0.2247
MTHFD_1	2.76497	1.61954	-0.771675	0.9965	0.9965
G3PAT160	0.00132257	0.00122417	-0.111533	0.1671	0.1671
CBPS	0.0452839	0.0377177	-0.263759	0.0943	0.0943
CS	0.117909	0.193103	0.711691	0.4438	0.4438
Kabcpp	0.00192676	0.00178342	-0.111533	0.1671	0.1671
DPLPTAT1	8.758e-05	8.10644e-05	-0.111533	0.1671	0.1671
PGM	0.0205572	1.17036	5.83117	0.9998	0.9998
MTHFR3	-0.00101402	-0.000938583	-0.111533	0.1671	0.1671
SHK3Dr	0.00446752	0.00413515	-0.111533	0.1671	0.1671
SERDA	0.0587501	0.0392677	-0.581248	0.1484	0.1484
GF6PTA	0.00120422	0.00111463	-0.111533	0.1671	0.1671
PGCM	-0.00156549	-0.00144903	-0.111533	0.1671	0.1671
ASPCT	0.00110859	0.00102586	-0.111888	0.1673	0.1673
NADH16pp	4.12944	4.97776	0.269549	0.901	0.901
AIRC3	0.0931403	0.0692806	-0.426956	0.1154	0.1154
IMPC	0.00215847	0.00199789	-0.111533	0.1671	0.1671
PGK	1.94726	0.430031	-2.17893	0.9919	0.9919
ACLS	0.00610126	0.00564735	-0.111533	0.1671	0.1671
TALA	0.0589254	0.0495386	-0.250335	0.2205	0.2205
IMPD	0.000571525	0.000529006	-0.111533	0.1671	0.1671
DHQS	0.00446752	0.00413515	-0.111533	0.1671	0.1671
AIRCr	0.0918706	0.0682399	-0.428988	0.1151	0.1151
DHQTi	0.00446752	0.00413515	-0.111533	0.1671	0.1671
AIRC2	0.0931403	0.0692806	-0.426956	0.1154	0.1154
3OAS120	0.00953071	0.00882167	-0.111533	0.1671	0.1671
3HAD40_2	0.00953071	0.00882167	-0.111533	0.1671	0.1671
HISTD	0.00100717	0.00093224	-0.111533	0.1671	0.1671
PRAMPC	0.00100717	0.00093224	-0.111533	0.1671	0.1671
ACYP_2	0.0504622	0.0349785	-0.528733	0.1332	0.1332
FALTHFL	2.68944	8.74749e-07	-21.5519	1	1
DXPS	0.00587752	0.00544026	-0.111533	0.1671	0.1671
APSR	0.00136669	0.00126501	-0.111533	0.1671	0.1671
FBA	-0.406678	-0.172293	-1.23903	0.5127	0.5127
CYTK1	0.00881246	0.00815708	-0.111493	0.1669	0.1669
AICART	0.00215847	0.00199789	-0.111533	0.1671	0.1671
EAR180y	0.00220215	0.0018852	-0.224197	0.0879	0.0879
RBCh	0.0128687	0.0134433	0.0630236	0.0223	0.0223
UM3PL	0.000580217	0.000537051	-0.111533	0.1671	0.1671
EAR140x_1	0.00944313	0.0087406	-0.111533	0.1671	0.1671
UAGCVT	0.000580217	0.000537051	-0.111533	0.1671	0.1671
NH4tpp_1	0.0648029	0.0582537	-0.153709	0.1768	0.1768
RNTR3	0.0284826	0.0193518	-0.557616	0.1568	0.1568
ADSS	0.0237874	0.0179487	-0.406319	0.1071	0.1071
HSK	0.0023975	0.00221914	-0.111533	0.1671	0.1671
KARA1	0.00610126	0.00564735	-0.111533	0.1671	0.1671
EAR60y	0.00442727	0.00425727	-0.0564893	0.0284	0.0284
ADK1	0.846187	1.75634	1.05353	0.9383	0.9383
DXPRIi	0.00587399	0.00543699	-0.111533	0.1671	0.1671
EAR80y	0.00540285	0.00401007	-0.430093	0.1865	0.1865
CDPMEK	0.00587399	0.00543699	-0.111533	0.1671	0.1671
HMBDPO	0.00587399	0.00543699	-0.111533	0.1671	0.1671
GLUPRT	0.0011524	0.00106667	-0.111533	0.1671	0.1671
TPI	0.890666	0.333816	-1.41583	0.9765	0.9765
PSP_L	0.128998	0.891694	2.7892	0.9943	0.9943
EAR40y	0.00490179	0.00409951	-0.257857	0.0969	0.0969
UMPK	0.0722081	0.0489573	-0.560635	0.2464	0.2464
3OAS100	0.00953071	0.00882167	-0.111533	0.1671	0.1671
CYNL	0.0322823	0.0246626	-0.388415	0.1014	0.1014
SQLS	0.000215563	0.000185607	-0.215857	0.0729	0.0729
SQLSx	0.000227322	0.00018937	-0.263534	0.0755	0.0755
PSERT	-0.128998	-0.891694	2.7892	0.9943	0.9943
G6PDH2r	0.0357605	0.105126	1.55568	0.3965	0.3965
PPS	0.195162	1.27055	2.70271	0.996	0.996
IPPS	0.00339372	0.00314124	-0.111533	0.1671	0.1671
3OAR40	0.00953071	0.00882167	-0.111533	0.1671	0.1671
NDPK7	0.00275834	0.00111082	-1.31217	0.3517	0.3517
MOBDabc	3.45722e-05	3.20002e-05	-0.111533	0.1671	0.1671
MG2uabcpp	0.000766325	0.000709313	-0.111533	0.1671	0.1671
3OAR60	0.00953071	0.00882167	-0.111533	0.1671	0.1671
GLNS	0.251708	0.187876	-0.421971	0.2022	0.2022
SO4t2pp	0.00136669	0.00126501	-0.111533	0.1671	0.1671
CYSS	0.00136669	0.00126501	-0.111533	0.1671	0.1671
FACOAE120	0.0435264	0.036286	-0.262479	0.0718	0.0718
atpm	3.60551	3.57036	-0.0141315	0.1483	0.1483
ADA	0.0222096	0.0164425	-0.433758	0.1047	0.1047
RNTRA3	0.026678	0.0194406	-0.456575	0.1419	0.1419
METAT	0.0570596	0.0414047	-0.462674	0.175	0.175
CTPS1	0.129954	0.0931669	-0.480108	0.1564	0.1564
PRFGS	0.0011524	0.00106667	-0.111533	0.1671	0.1671
UAAGMDAt2	0.000580217	0.000537051	-0.111533	0.1671	0.1671
SQLC	8.758e-05	8.10644e-05	-0.111533	0.1671	0.1671
CTPS2	0.0570923	0.0412601	-0.468548	0.1281	0.1281
GLUTRS	3.87979e-05	3.59115e-05	-0.111533	0.1671	0.1671
ANS	0.00078822	0.000729579	-0.111533	0.1671	0.1671
ADPT	0.0247831	0.0174986	-0.50212	0.136	0.136
AHCi	0.056969	0.0413054	-0.463849	0.175	0.175
ASNTRH	0.00130275	0.00120583	-0.111533	0.1671	0.1671
UAMAGS	0.000580217	0.000537051	-0.111533	0.1671	0.1671
PEPC	0.0983189	0.0762156	-0.367382	0.1046	0.1046
TTHS	0.000448847	0.000415455	-0.111533	0.1671	0.1671
AHTS	8.758e-05	8.10644e-05	-0.111533	0.1671	0.1671
FHS	8.758e-05	8.10644e-05	-0.111533	0.1671	0.1671
EAR180x	0.00193642	0.00192658	-0.0073455	0.0228	0.0228
AGPR	0.00798782	0.00832753	0.0600869	0.021	0.021
RHS	8.758e-05	8.10644e-05	-0.111533	0.1671	0.1671
GHMT2r	0.0509397	0.83669	4.03783	0.9969	0.9969
PRPPS	0.202417	0.147712	-0.454545	0.2819	0.2819
PKETX	0.177522	0.275152	0.632237	0.4211	0.4211
EAR40x	0.00415392	0.00433835	0.0626742	0.0235	0.0235
3HAD180	0.00431572	0.00399465	-0.111533	0.1671	0.1671
DRPA	0.0704743	0.0473355	-0.574172	0.2454	0.2454
ORNTAC	0.00798782	0.00832753	0.0600869	0.021	0.021
PUNP1	0.0246835	0.0174017	-0.50432	0.1362	0.1362
G5SADs	-0.00388636	-0.00359723	-0.111533	0.1671	0.1671
PRASCSi	0.0011513	0.00106565	-0.111533	0.1671	0.1671
ACONT	0.117897	0.193091	0.711751	0.4438	0.4438
CAT	0.00315815	0.0033773	0.0967926	0.0255	0.0255
AFC	4.379e-05	4.05322e-05	-0.111533	0.1671	0.1671
KDOCT2	4.379e-05	4.05322e-05	-0.111533	0.1671	0.1671
3OAS180	0.00431572	0.00399465	-0.111533	0.1671	0.1671
DHORD2	0.000534899	0.000557736	0.0603156	0.0324	0.0324
NADPHQR3	0.186828	0.0890546	-1.06895	0.2558	0.2558
ACGK	0.00798782	0.00832753	0.0600869	0.021	0.021
SUCDHm8	-0.0901599	-0.165041	0.872264	0.437	0.437
UAGDP	0.00120422	0.00111463	-0.111533	0.1671	0.1671
ALCD2x	-0.00608881	-0.00623842	0.0350184	0.0164	0.0164
PGL	0.0357605	0.105126	1.55568	0.3965	0.3965
EAR100x	0.00953071	0.00882167	-0.111533	0.1671	0.1671
3OAR180	0.00431572	0.00399465	-0.111533	0.1671	0.1671
A5PISO	4.379e-05	4.05322e-05	-0.111533	0.1671	0.1671
ATPPRT	-0.00100717	-0.00093224	-0.111533	0.1671	0.1671
UAMAS	0.000580217	0.000537051	-0.111533	0.1671	0.1671
PRAGSr	0.0011524	0.00106667	-0.111533	0.1671	0.1671
DAPDC	0.00353604	0.00327297	-0.111533	0.1671	0.1671
IPDDI	-0.000499508	-0.000714859	0.51715	0.0786	0.0786
DHAD1	0.00610126	0.00564735	-0.111533	0.1671	0.1671
KDOPP	4.379e-05	4.05322e-05	-0.111533	0.1671	0.1671
OCBT	0.00798782	0.00832753	0.0600869	0.021	0.021
EAR160x	0.00814423	0.00753834	-0.111533	0.1671	0.1671
3OAS80	0.00953071	0.00882167	-0.111533	0.1671	0.1671
UAGPT3	0.000580217	0.000537051	-0.111533	0.1671	0.1671
UPPRT	0.129114	0.0922367	-0.485231	0.222	0.222
DHAD2	0.00202529	0.00187461	-0.111533	0.1671	0.1671
GLU5K	0.10297	0.0810873	-0.34467	0.094	0.094
PPNDH	0.00366851	0.00339558	-0.111533	0.1671	0.1671
PRMICI	0.00100717	0.00093224	-0.111533	0.1671	0.1671
GLUDC	0.0150907	0.0285047	0.917545	0.2337	0.2337
ERTHMMOR	0.00202529	0.00187461	-0.111533	0.1671	0.1671
MALS	0.0277724	0.0290136	0.0630799	0.0476	0.0476
G3PD1	0.0017365	0.00201563	0.215042	0.0739	0.0739
G3PD2	0.00220338	0.00170814	-0.367289	0.132	0.132
HSTPT	-0.00100717	-0.00093224	-0.111533	0.1671	0.1671
MCITD	0.00202529	0.00187461	-0.111533	0.1671	0.1671
PGI	-0.0373302	-0.106711	1.51529	0.3963	0.3963
KARA2x	0.00100944	0.000887317	-0.18603	0.0819	0.0819
ENO	-0.0206076	-1.17042	5.82772	0.9998	0.9998
UDCPP	0.000580217	0.000537051	-0.111533	0.1671	0.1671
FE2Gabcpp	6.944e-05	6.42739e-05	-0.111533	0.1671	0.1671
EAR80x	0.00370198	0.0044591	0.268454	0.1097	0.1097
ILETA	0.00202529	0.00187461	-0.111533	0.1671	0.1671
ALAR	0.00116043	0.0010741	-0.111533	0.1671	0.1671
DHORD5	0.000523296	0.000426886	-0.293778	0.106	0.106
KARI_23dhmb	0.000941633	0.000905338	-0.0567074	0.0365	0.0365
ADSL1r	0.0237874	0.0179487	-0.406319	0.1071	0.1071
SULR	0.00136669	0.00126501	-0.111533	0.1671	0.1671
LEUTAi	-0.00339372	-0.00314124	-0.111533	0.1671	0.1671
ACS	0.247037	0.171932	-0.522887	0.2258	0.2258
UHGADA	4.379e-05	4.05322e-05	-0.111533	0.1671	0.1671
MHPGLUT	0.00063684	0.000554199	-0.200525	0.109	0.109
ARGDC	0.00631341	0.00675287	0.0970832	0.0255	0.0255
VALTA	-0.00270403	-0.00250286	-0.111533	0.1671	0.1671
ASNS1	0.00130275	0.00120583	-0.111533	0.1671	0.1671
U23GAAT	4.379e-05	4.05322e-05	-0.111533	0.1671	0.1671
GND	0.0357592	0.105124	1.55571	0.3965	0.3965
PHEH	0.00135858	0.00125751	-0.111533	0.1671	0.1671
PAPPT4	0.000580217	0.000537051	-0.111533	0.1671	0.1671
G5SD	0.10297	0.0810873	-0.34467	0.094	0.094
D78FOR	0.00135858	0.00125751	-0.111533	0.1671	0.1671
GLUDy	0.970025	1.53571	0.66281	0.5281	0.5281
GLUSy	0.0974278	0.0671237	-0.537511	0.1279	0.1279
RPI	0.334078	0.0431319	-2.95336	0.959	0.959
3OAS140	0.00953071	0.00882167	-0.111533	0.1671	0.1671
SS	-0.000153028	-0.000173269	0.179214	0.0555	0.0555
SSx	0.000180595	0.000173767	-0.0556073	0.0341	0.0341
FBP	0.545535	0.272601	-1.00088	0.4846	0.4846
IG3PS_2	0.000651365	0.00093224	0.517236	0.4928	0.4928
FUM	-0.1348	-0.204315	0.599977	0.3705	0.3705
PSPPS	0.000408392	0.000416128	0.0270732	0.0439	0.0439
HSDH	0.00175686	0.00138025	-0.348068	0.1262	0.1262
HSDy	0.0014847	0.00164189	0.145186	0.0635	0.0635
ICHDx	0.074399	0.121127	0.703166	0.3878	0.3878
SERAT	0.00136669	0.00126501	-0.111533	0.1671	0.1671
APDH	0.0587501	0.0392677	-0.581248	0.1484	0.1484
ASAD	-0.00751348	-0.00695451	-0.111533	0.1671	0.1671
PYNP2r	0.0456335	0.032624	-0.484158	0.1049	0.1049
PRUK	1.03704	0.074682	-3.79557	0.9947	0.9947
ALAALAr	0.000580217	0.000537051	-0.111533	0.1671	0.1671
PSCVT	0.00446752	0.00413515	-0.111533	0.1671	0.1671
IGPDH	0.00100717	0.00093224	-0.111533	0.1671	0.1671
ACHBS	0.00202529	0.00187461	-0.111533	0.1671	0.1671
DCYTD	0.0704743	0.0473355	-0.574172	0.2454	0.2454
P5CRx	0.00178667	0.00181261	0.0207929	0.0179	0.0179
P5CR	0.00190829	0.00162278	-0.233811	0.0916	0.0916
FA160ACPHi	0.00148339	0.00137303	-0.111533	0.1671	0.1671
MECDPS	0.00587399	0.00543699	-0.111533	0.1671	0.1671
PYK	0.0920075	0.066685	-0.464388	0.1059	0.1059
CITMS	0.00202529	0.00187461	-0.111533	0.1671	0.1671
CYTCBB3pp1	2.51636	2.56613	0.0282552	0.1669	0.1669
DAPE	0.00411626	0.00381002	-0.111533	0.1671	0.1671
CHORS	0.00446752	0.00413515	-0.111533	0.1671	0.1671
ACKr	-0.100067	-0.0777736	-0.363619	0.1034	0.1034
CITCIb	0.00202529	0.00187461	-0.111533	0.1671	0.1671
PIuabcpp	0.012711	0.0117653	-0.111533	0.1671	0.1671
NTPP3	0.0704743	0.0473355	-0.574172	0.2454	0.2454
PUTA3	0.099072	0.0772637	-0.358688	0.0932	0.0932
DMATT	0.00195216	0.00180692	-0.111533	0.1671	0.1671
GRTT	0.00195216	0.00180692	-0.111533	0.1671	0.1671
MEOHDHpp	3.44653	1.0133e-06	-21.6976	1	1
GLUR	0.000580217	0.000537051	-0.111533	0.1671	0.1671
FA180ACPH	0.00167059	0.0015463	-0.111533	0.1671	0.1671
FA140ACPHi	0.00050249	0.000465107	-0.111533	0.1671	0.1671
OOR3r	0.00387707	0.00164129	-1.24014	0.3106	0.3106
POR_syn	0.00734504	0.00861078	0.229374	0.2168	0.2168
NTD3pp	0.0704743	0.0473355	-0.574172	0.2454	0.2454
PSD180	0.000428047	0.000396202	-0.111533	0.1671	0.1671
PSD160	0.000379878	0.000351617	-0.111533	0.1671	0.1671
PSD140	0.00012918	0.00011957	-0.111533	0.1671	0.1671
PSSA180	0.000438009	0.000405423	-0.111533	0.1671	0.1671
PSSA160	0.000388724	0.000359804	-0.111533	0.1671	0.1671
PSSA140	0.00013218	0.000122346	-0.111533	0.1671	0.1671
DASYN180	0.00132257	0.00122417	-0.111533	0.1671	0.1671
DASYN160	0.00117256	0.00108533	-0.111533	0.1671	0.1671
DASYN140	0.000398204	0.000368579	-0.111533	0.1671	0.1671
AGPAT180	0.00132257	0.00122417	-0.111533	0.1671	0.1671
AGPAT160	0.00117256	0.00108533	-0.111533	0.1671	0.1671
AGPAT140	0.000398204	0.000368579	-0.111533	0.1671	0.1671
G3PAT180	0.00117256	0.00108533	-0.111533	0.1671	0.1671
G3PAT140	0.000398204	0.000368579	-0.111533	0.1671	0.1671
PGPP180	0.000588975	0.000545158	-0.111533	0.1671	0.1671
PGPP160	0.000522195	0.000483346	-0.111533	0.1671	0.1671
PGSA180	0.000588975	0.000545158	-0.111533	0.1671	0.1671
PGSA160	0.000522195	0.000483346	-0.111533	0.1671	0.1671
CDLPNS140cmp	8.86747e-05	8.20777e-05	-0.111533	0.1671	0.1671
FTHFD	0.0995741	0.0711752	-0.484396	0.1315	0.1315
PPTGS_MF	0.000580217	0.000537051	-0.111533	0.1671	0.1671
PGPP140	0.000177349	0.000164155	-0.111533	0.1671	0.1671
PGSA140	0.000177349	0.000164155	-0.111533	0.1671	0.1671
CDLPNS180cmp	0.000295582	0.000273592	-0.111533	0.1671	0.1671
CDLPNS160cmp	0.000261645	0.00024218	-0.111533	0.1671	0.1671
CYO1_KT	0.817429	3.97762	2.28274	0.9987	0.9987
FE2tex	6.944e-05	6.42739e-05	-0.111533	0.1671	0.1671
Ktex	0.00192676	0.00178342	-0.111533	0.1671	0.1671
NH4tex	0.254872	0.214712	-0.247375	0.1748	0.1748
MG2tex	0.000766325	0.000709313	-0.111533	0.1671	0.1671
NAtex	0.000426952	0.000395189	-0.111533	0.1671	0.1671
PItex	0.012711	0.0117653	-0.111533	0.1671	0.1671
SO4tex	0.00136669	0.00126501	-0.111533	0.1671	0.1671
MOBDtex	3.45722e-05	3.20002e-05	-0.111533	0.1671	0.1671
CO2tex	-2.69712	-2.73223	0.0186629	0.1207	0.1207
CO2tpp	-2.69712	-2.73223	0.0186629	0.1207	0.1207
H2Otex	-6.26795	-2.85968	-1.13214	1	1
H2Otpp	-3.44277	-1.59692	-1.10828	0.9988	0.9988
O2tex	6.18726	3.90626	-0.663514	0.9995	0.9995
O2tpp	2.54154	2.59084	0.0277138	0.1656	0.1656
CU2t5pp	0.000109475	0.00010133	-0.111533	0.1671	0.1671
CU2tex	0.000109475	0.00010133	-0.111533	0.1671	0.1671
CA2tex	0.000109475	0.00010133	-0.111533	0.1671	0.1671
CLtex	0.00234276	0.00216847	-0.111533	0.1671	0.1671
AGDI_1	0.00631341	0.00675287	0.0970832	0.0255	0.0255
CMPA_1	0.00631341	0.00675287	0.0970832	0.0255	0.0255
ABTA	0.0254196	0.0394211	0.633028	0.2247	0.2247
GGPTRCS	0.00631341	0.00675287	0.0970832	0.0255	0.0255
GGPTRCO	0.00631341	0.00675287	0.0970832	0.0255	0.0255
GGGABADr	0.00631341	0.00675287	0.0970832	0.0255	0.0255
GGGABAH	0.00631341	0.00675287	0.0970832	0.0255	0.0255
GLGC	0.00128086	0.00118557	-0.111533	0.1671	0.1671
GLCS1	0.00128086	0.00118557	-0.111533	0.1671	0.1671
FALDtpp	2.68944	8.74749e-07	-21.5519	1	1
ATPS1	0.443048	0.365396	-0.277999	0.1517	0.1517
PGLYCP	0.0128687	0.0134433	0.0630236	0.0223	0.0223
NAtpp	0.000426952	0.000395189	-0.111533	0.1671	0.1671
CA2abcpp	0.000109475	0.00010133	-0.111533	0.1671	0.1671
CLtipp	0.00234276	0.00216847	-0.111533	0.1671	0.1671
NTD2	0.0456335	0.032624	-0.484158	0.1049	0.1049
PPM2	0.0704743	0.0473355	-0.574172	0.2454	0.2454
FORtex	-0.0622961	-0.0433289	-0.523812	0.1391	0.1391
SUCCt1pp	-0.00683346	-0.00647666	-0.0773659	0.019	0.019
SUCCtex	-0.00683346	-0.00647666	-0.0773659	0.019	0.019
AKGtex	-0.0035595	-0.00429774	0.271903	0.0685	0.0685
AKGt2rpp	-0.0035595	-0.00429774	0.271903	0.0685	0.0685
ACt2rpp	-0.00916932	-0.0106391	0.214493	0.0627	0.0627
ACtex	-0.00916932	-0.0106391	0.214493	0.0627	0.0627
PYRt2rpp	-0.00736579	-0.00878658	0.254462	0.0664	0.0664
PYRtex	-0.00736579	-0.00878658	0.254462	0.0664	0.0664
L_LACtex	-0.00640332	-0.00683013	0.093094	0.0296	0.0296
L_LACt2rpp	-0.00640332	-0.00683013	0.093094	0.0296	0.0296
ETOHtex	-0.00608881	-0.00623842	0.0350184	0.0164	0.0164
ETOHtrpp	-0.00608881	-0.00623842	0.0350184	0.0164	0.0164
HSST	0.000999725	0.00092535	-0.111533	0.1671	0.1671
SHSL1	0.000999725	0.00092535	-0.111533	0.1671	0.1671
CYSTL	0.000999725	0.00092535	-0.111533	0.1671	0.1671
METS	0.00032672	0.000336766	0.0436925	0.0237	0.0237
FTHFLi	-2.63924	-1.52182	-0.79433	0.9909	0.9909
FALDHpp	0.743218	9.30558e-08	-22.9292	1	1
CBMD	0.0322823	0.0246626	-0.388415	0.1014	0.1014
CBPD	0.0322823	0.0246626	-0.388415	0.1014	0.1014
AMOq8	0.189188	0.15549	-0.283002	0.1447	0.1447
HAO1pp	0.189188	0.15549	-0.283002	0.1447	0.1447
NITR_NOpp	-0.0637431	-0.0554509	-0.201058	0.078	0.078
NORpp	0.0197676	0.0161464	-0.291925	0.0874	0.0874
NO2tpp	0.00595835	0.00748996	0.330045	0.088	0.088
NO2tex	-0.0547076	-0.0437506	-0.322436	0.0956	0.0956
N2Otex	-0.0197676	-0.0161464	-0.291925	0.0874	0.0874
NOtex	-0.0460492	-0.0372663	-0.305307	0.0822	0.0822
BIOMASS_Mfumariolicum_Pic	0.0118952	0.0110103	-0.111533	0.1671	0.1671
DM_biomass	0.0118952	0.0110103	-0.111533	0.1671	0.1671
DM_cyt554red_p	0.567564	0.466469	-0.283002	0.1447	0.1447
SK_cyt554oxi_p	-0.567564	-0.466469	-0.283002	0.1447	0.1447
EX_o2_e	-6.18726	-3.90626	-0.663514	0.9995	0.9995
EX_nh4_e	-0.254872	-0.214712	-0.247375	0.1748	0.1748
EX_h2o_e	6.26795	2.85968	-1.13214	1	1
EX_h_e	0.886095	0.730793	-0.277999	0.1517	0.1517
EX_pi_e	-0.012711	-0.0117653	-0.111533	0.1671	0.1671
EX_so4_e	-0.00136669	-0.00126501	-0.111533	0.1671	0.1671
EX_fe2_e	-6.944e-05	-6.42739e-05	-0.111533	0.1671	0.1671
EX_mg2_e	-0.000766325	-0.000709313	-0.111533	0.1671	0.1671
EX_k_e	-0.00192676	-0.00178342	-0.111533	0.1671	0.1671
EX_na1_e	-0.000426952	-0.000395189	-0.111533	0.1671	0.1671
EX_mobd_e	-3.45722e-05	-3.20002e-05	-0.111533	0.1671	0.1671
EX_cu2_e	-0.000109475	-0.00010133	-0.111533	0.1671	0.1671
EX_ca2_e	-0.000109475	-0.00010133	-0.111533	0.1671	0.1671
EX_cl_e	-0.00234276	-0.00216847	-0.111533	0.1671	0.1671
EX_co2_e	2.69712	2.73223	0.0186629	0.1207	0.1207
EX_for_e	0.0622961	0.0433289	-0.523812	0.1391	0.1391
EX_succ_e	0.00683346	0.00647666	-0.0773659	0.019	0.019
EX_akg_e	0.0035595	0.00429774	0.271903	0.0685	0.0685
EX_ac_e	0.00916932	0.0106391	0.214493	0.0627	0.0627
EX_pyr_e	0.00736579	0.00878658	0.254462	0.0664	0.0664
EX_lac__L_e	0.00640332	0.00683013	0.093094	0.0296	0.0296
EX_etoh_e	0.00608881	0.00623842	0.0350184	0.0164	0.0164
EX_no2_e	0.0547076	0.0437506	-0.322436	0.0956	0.0956
EX_no_e	0.0460492	0.0372663	-0.305307	0.0822	0.0822
EX_n2o_e	0.0197676	0.0161464	-0.291925	0.0874	0.0874
